# Supplementary material for: OPA1 supports mitochondrial dynamics and immune evasion to CD8 + T cell in lung adenocarcinoma
Source: PeerJ journal article supplement (doi:10.7717/peerj.14543), 2022-12-21

**A**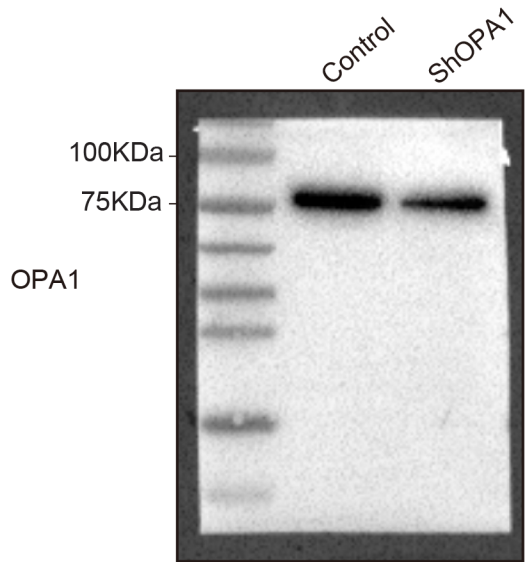**B**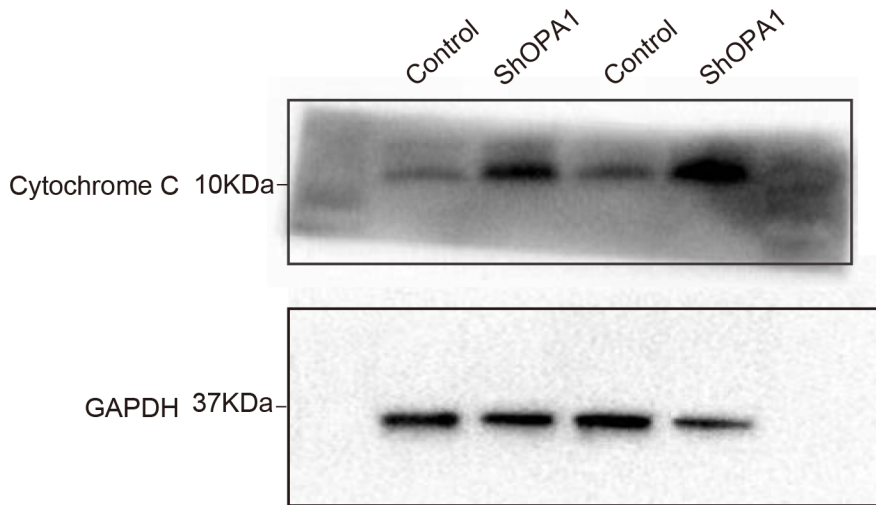

Supplement: s2-revised.pdf [file s2-revised.pdf]
