# Supplementary material for: OPA1 supports mitochondrial dynamics and immune evasion to CD8+ T cell in lung adenocarcinoma
Source: PeerJ. 2022 Dec 21;10:e14543. doi: 10.7717/peerj.14543 (PMC9789695; doi:10.7717/peerj.14543)
Supplement: Supplemental Information 1 [file peerj-10-14543-s001.xlsx]

## Sheet: Supplementary Table2
Supplementary Table2
Raw data of RNA-seq(related to Fig2 A-E)								Raw data of the length/width ratio of mitochondria(related to Fig2 F)					Raw data of ATP(related to Fig2 G)
sample_name	Control_1	Control_2	Control_3	shOPA1_1	shOPA1_2	shOPA1_3		Cell Type	Length	Width	Length/Width			Control	ShOPA1
GSDMD	432	326	378	42	11	38		Control	750.655	449.284	1.67078		absorbance value	36212540	30348456
SPHK1	1401	1374	1104	469	507	408		Control	565.816	395.442	1.43084			37231164	15417091(abnormal value)
MAT1A	20	19	13	147	196	137		Control	911.137	516.924	1.76261			35864396	34077380
GPAT2P1	171	157	134	48	37	28		Control	628.189	330.369	1.90148		ATP concentration	12.0612	10.1065
NPAS2	24	30	23	169	460	183		Control	917.277	223.402	4.10595			12.4008	5.129403 (abnormal value)
CLK1	50	44	25	251	544	230		Control	669.148	349.602	1.91403			11.9452	11.3495
HLA-DPA1	1	0	4	34	50	47		Control	640.29	244.751	2.61609		Protein concentration	4.8662	5.5508
DDO	12	6	12	81	115	74		Control	503.085	255.505	1.96898			4.8662
JCAD	1	3	2	33	60	33		Control	811.605	228.845	3.54653			4.8662	5.5508
ATAD3B	3698	3309	2778	1338	865	1110		Control	968.522	247.328	3.91594		ATP concentration/ Protein concentration	2.47857	1.82073
VGF	10730	11143	7307	3857	3180	3414		Control	827.52	299.081	2.76688			2.54834
FXYD6	2	0	1	32	29	35		Control	1005.19	370.788	2.71096			2.45472	2.04466
BOP1	12663	13189	13271	4295	2260	3814		Control	675.058	440.553	1.5323
SCARF2	812	861	852	331	179	249		Control	775.861	315.466	2.45941
DDN	99	94	67	21	17	24		Control	1019.26	565.092	1.80371
ANGPTL4	2727	2777	2173	1210	1260	1121		Control	702.529	488.34	1.43861
MATK	73	56	49	15	6	11		Control	777.715	405.659	1.91716
ANPEP	1825	1876	1497	685	1095	627		Control	669.113	430.199	1.55536
GPAT2	1757	1334	1566	534	296	526		Control	745.044	522.218	1.42669
ZNF780A	37	27	21	151	309	147		Control	721.703	579.871	1.24459
SLC27A4	5048	5188	4925	2202	1639	2078		Control	750.332	544.523	1.37796
HPDL	411	385	266	134	91	123		Control	987.398	635.533	1.55365
NEAT1	460	349	378	1392	3248	1470		Control	632.261	339.741	1.86101
SPTBN2	1022	1226	594	377	297	303		Control	864.665	345.89	2.49983
LAPTM5	2	1	1	23	55	24		Control	651.335	552.52	1.17884
DUS3L	2327	2217	2391	1082	731	939		Control	623.736	555.076	1.12369
ITGAX	21	30	23	154	180	108		ShOPA1	535.181	504.259	1.06132
SRM	5553	6241	5156	2532	1989	2471		ShOPA1	863.41	754.223	1.14477
CCNG1	498	422	324	1312	2032	1401		ShOPA1	676.314	532.45	1.27019
MAGEA1	395	379	423	142	71	132		ShOPA1	628.807	576.888	1.09
C3orf38	31	37	28	143	198	154		ShOPA1	567.79	385.402	1.47324
HIST1H2AC	197	185	241	721	1038	735		ShOPA1	708.989	535.625	1.32367
FBRSL1	2792	2887	2505	1320	1024	1261		ShOPA1	572.224	428.509	1.33538
VPS9D1-AS1	497	482	320	189	151	175		ShOPA1	685.736	474.396	1.44549
CD22	3	0	0	32	80	18		ShOPA1	648.852	522.213	1.2425
XAGE1B	17	27	35	131	214	165		ShOPA1	321.978	289.321	1.11287
SDF2L1	3103	3228	3127	1484	814	1138		ShOPA1	506.273	361.711	1.39966
ATAD3A	5395	5170	4562	2405	1620	2148		ShOPA1	798.266	339.292	2.35274
CTSO	8	7	15	62	114	71		ShOPA1	677.184	326.856	2.07181
MED21	134	102	102	387	669	378		ShOPA1	469.09	296.926	1.57982
SH3GL2	10	8	9	50	110	60		ShOPA1	708.908	555.374	1.27645
ARMC6	3180	2862	2419	1388	1085	1357		ShOPA1	753.901	519.156	1.45217
GLI2	32	35	16	158	168	132		ShOPA1	520.982	390.389	1.33452
CLN6	1354	1275	1309	702	578	653		ShOPA1	655.065	578.292	1.13276
PRUNE2	11	18	5	69	214	94		ShOPA1	463.434	285.506	1.6232
TMEM263	102	85	64	312	473	277		ShOPA1	644.703	412.021	1.56473
BX255925.3	1560	1553	1334	872	774	689		ShOPA1	619.152	405.252	1.52782
GATA2-AS1	24	23	23	6	5	1
DPYSL4	38	32	28	3	12	6
ZBED8	26	19	17	93	134	97
ZBED5	54	41	26	166	329	172
ZFP30	95	82	56	283	363	311
SH2D5	975	922	540	379	302	339
SLC52A2	3919	3636	3862	2092	1641	1807
NCLN	9832	9982	7416	4677	3585	4121
ANKRD13B	644	614	451	303	229	249
NDOR1	2266	2183	1763	1154	1055	1068
RFLNA	4071	3957	2050	1566	1562	1285
KRCC1	27	20	7	130	137	94
GNB1L	1083	881	1182	458	218	379
CTU2	1872	1549	1481	826	561	785
RRP9	2686	2401	2407	1172	685	1114
NPAS1	380	343	372	121	65	150
NOC2L	12095	11853	8625	5631	4626	5136
PKMYT1	3285	2921	2537	1609	1260	1459
TBX1	543	522	449	193	101	210
WNT5B	532	416	295	187	213	188
RSRP1	76	82	123	410	457	353
LRFN4	1620	1715	1571	875	699	859
POLD1	4285	4258	3884	2147	1443	1959
SMG1P2	16	15	6	67	100	65
FAM3C	261	256	374	1019	1247	1080
AC021078.1	25	33	10	131	211	108
CLK4	11	7	8	49	130	50
DPY19L4	120	89	64	324	490	302
HSD17B11	252	163	214	657	882	662
CPE	201	178	214	609	787	611
WDR4	1068	1071	764	507	455	509
ZC3H6	15	6	12	58	97	60
CSAD	62	43	44	176	236	202
POLRMT	8863	9668	7940	4245	2547	3897
ZNF322	34	31	26	105	194	139
ERLEC1	139	138	105	412	751	374
NR3C1	159	135	116	458	938	396
SNX2	103	120	83	356	469	316
CCDC90B	131	108	105	369	484	348
LPGAT1	169	150	110	422	729	462
GALNT14	352	461	259	141	156	169
TRMT61A	3157	2808	3236	1633	1181	1535
RPS6KA4	9919	9010	9650	5010	3449	4542
TRMT1	3330	3014	2391	1711	1530	1479
TNFRSF12A	11898	10244	11111	6443	6088	5507
YPEL5	224	167	174	565	745	559
CGB8	50	25	34	7	5	11
FXR1	446	400	282	1102	1777	1053
ZNF791	51	66	51	183	321	215
TP53INP1	38	29	36	120	195	145
ZMYM4	128	125	138	381	674	411
APPBP2	109	90	104	348	550	283
RRP7A	3667	3462	3590	1929	1279	1742
TMEM201	1309	1364	961	666	537	623
KRTAP2-3	29	50	7	3	2	1
C5	12	16	15	62	113	69
EIF4A2	1516	1339	1010	4180	4241	4037
PAQR4	1881	1713	1431	944	674	848
EPS8L1	763	693	687	309	165	324
DUSP2	93	77	45	25	29	15
FOXA3	50	45	46	15	5	14
REXO1	2861	2909	2502	1690	1746	1440
RPP25	1621	1483	1210	820	606	739
ALG3	3446	3499	3167	1780	1334	1812
ARRDC3	60	78	21	281	382	257
TLNRD1	504	601	419	230	366	206
ARID3B	583	559	395	240	361	235
NTMT1	4403	3815	4660	1902	929	1798
RPS6KA2	4	0	2	30	28	18
NOC4L	2099	1933	2238	1141	788	1057
NSL1	59	74	56	217	309	208
KIAA0232	93	85	66	260	482	250
SRP9	468	441	266	1119	1877	1221
EPM2AIP1	49	38	36	144	299	143
PLEKHA5	158	113	94	362	716	392
LIMCH1	4	1	1	22	58	18
TBRG4	10617	10439	9677	5717	4053	5093
USP33	173	113	100	402	778	398
GRWD1	3417	3109	3029	1683	1153	1670
RGS9	106	95	84	293	388	302
TSSC4	1976	1784	2104	1121	866	1034
NWD1	2	2	4	20	37	26
MT-TP	2650	2039	1231	890	737	931
PLAG1	26	44	27	122	221	138
TAX1BP1	156	116	99	380	749	367
STRA6	44	33	40	169	254	116
JAKMIP2	13	8	5	49	70	43
WDR19	89	90	55	271	568	247
SLC35A4	3287	3054	2907	1881	2101	1670
ITCH	318	264	215	732	1506	756
VARS	16157	16394	12131	7298	4255	6752
AC005326.1	1	0	1	9	28	17
SMTN	4014	3798	2362	1845	1933	1667
AL365181.3	2099	2077	1607	1169	1098	1060
CDC42EP1	1184	1360	1831	766	488	615
SHANK1	589	608	497	332	297	305
PLOD3	6563	6259	4825	3309	3223	3263
NIPSNAP3A	67	41	70	218	365	199
MSMO1	182	190	167	476	906	533
ADORA1	9	0	5	59	41	44
C11orf54	27	25	30	126	130	99
ATL2	199	199	111	514	966	538
GPC1	1291	1256	1133	765	816	685
RHOQ	78	83	61	225	406	238
CITED4	2079	2003	2219	1191	760	1044
HGH1	2462	2406	2663	1410	880	1229
ACBD3	74	88	77	255	464	238
PLD1	55	60	68	222	405	182
ZC3H3	2009	2055	1445	1068	950	1009
CRBN	37	49	44	155	223	150
DCAF6	223	172	176	532	739	532
DHX40	432	330	375	981	1551	1030
FGFR4	861	814	600	350	139	280
BTF3L4	268	231	215	617	938	676
VSTM1	23	27	12	6	3	2
MBD3	5247	5047	5007	2902	2233	2808
AP000547.3	578	466	471	262	177	264
UBE2W	112	103	60	301	469	290
COL4A5	24	14	9	75	212	72
CEP57	110	99	70	283	456	282
RANGAP1	16896	16123	14374	9095	7064	8393
CCDC149	27	19	20	99	109	81
LMF1	211	172	196	110	88	82
RRP1	2829	2791	2200	1596	1314	1428
VEZF1	407	326	343	1009	1931	892
FASN	31208	34724	16149	12438	7789	10705
ARID5A	222	261	178	107	118	109
ACTR10	242	194	220	630	818	579
PREPL	147	119	95	339	586	360
UBA7	30	15	13	91	140	75
SLC19A1	1856	1705	1202	807	497	790
EML4	507	432	441	1269	1499	1225
PODXL2	1952	1850	1152	805	408	701
SYDE1	3925	3757	3167	2347	2129	1910
MOB4	36	28	14	108	182	102
SERINC1	410	407	331	1082	2699	1041
CCDC86	2011	1811	981	863	644	688
SLC5A6	2544	2634	1829	1450	1293	1220
MRPL2	3925	3333	3141	2045	1390	1809
NMD3	128	109	46	382	587	326
CTU1	718	733	656	369	259	390
TMEM88	33	29	38	13	8	9
AC010168.2	1	2	1	12	26	20
GPATCH2	39	28	20	106	206	107
ZFP14	30	19	32	102	146	110
OGT	599	554	489	1365	2572	1419
CD320	3658	3193	3785	1998	1280	1806
AC004233.3	107	144	85	38	38	52
MCOLN3	25	22	24	90	263	91
RARRES3	28	11	19	80	401	108
NAT8L	2226	2203	1570	1133	782	1048
CD46	132	161	109	404	1036	406
FGFRL1	1958	2165	1706	1178	898	1068
NR4A1	144	116	76	38	54	49
YDJC	3450	3218	3239	1888	1167	1694
DOHH	1688	1584	1461	980	818	924
FCGBP	1429	1487	541	434	614	367
CHMP5	335	241	198	768	917	738
CEP170B	2989	2731	1871	1500	1613	1328
ARHGDIA	10047	8669	9803	5762	5071	5242
CASZ1	156	173	87	59	72	44
KLF2	2297	2491	2022	1436	1319	1290
TMEM145	289	298	241	121	50	110
THSD7A	8	1	8	75	35	65
ATP1A3	89	85	62	29	29	37
GSKIP	75	60	62	209	260	211
KAT6B	97	73	67	239	414	228
STK17B	50	31	35	126	251	135
CREBRF	24	18	10	90	223	63
TCEA1	902	590	597	1950	3642	1750
MALAT1	130	136	85	333	491	389
MYBBP1A	2922	3035	1459	1270	1244	1128
CYBRD1	483	447	343	1105	1784	1062
MMP28	5	3	5	26	61	25
PRKAA1	269	200	150	594	976	558
CPLX1	93	96	104	42	18	36
PJA2	286	200	157	561	1028	663
DDX50	193	176	149	470	683	456
SNX6	247	190	151	507	809	597
CYFIP2	76	78	65	270	258	226
TRPS1	45	37	42	147	173	138
XRCC3	3514	3094	2783	1716	971	1581
AC007846.1	30	32	10	4	7	2
CLCN7	2802	2856	2275	1737	1520	1459
FLNC	33057	37044	18614	14693	10658	13405
CHTF18	1544	1511	1249	871	676	836
EBLN3P	171	138	133	405	838	395
AP5B1	1831	1747	1331	1060	1130	882
YIPF4	265	252	224	609	1184	664
BAG4	45	43	34	123	207	144
PROS1	29	16	16	72	132	87
FAM207A	2562	2090	2044	1238	663	1098
PSD3	125	128	65	341	451	368
ATP13A1	4574	4740	3181	2437	1949	2272
NCOA2	138	169	114	427	911	377
MIER1	72	69	52	179	346	210
ALG1	882	870	866	526	494	546
RNF146	60	62	69	217	402	173
HDHD3	1491	1137	1539	803	487	696
AP1M2	925	734	495	395	248	337
C11orf68	4582	4288	5031	2875	2363	2598
SPOPL	65	68	47	174	342	192
SCRIB	10106	10171	7610	5442	3604	4787
SLC25A27	9	5	8	32	71	39
PTPN23	3308	3238	2306	1825	1780	1698
DPF1	1483	1387	967	727	491	687
LAMC3	183	126	119	52	21	57
FEZ1	51	39	32	152	170	130
PPP2R5A	107	102	113	337	569	266
LAMTOR3	72	54	28	188	249	192
VEZT	132	122	89	314	771	335
BIVM	15	7	10	44	94	49
CLIC4	832	696	775	1962	4058	1889
CDC42BPA	69	84	42	243	512	188
SMARCA1	270	305	240	682	1118	712
SMIM11A	9	9	19	28	285	313
TOP2A	658	631	390	1498	2976	1480
SFMBT2	10	1	9	40	114	44
PLCB1	3	4	3	18	36	27
CAPN15	4483	4601	3267	2555	2131	2305
YTHDF3	291	280	228	685	1436	675
IGF2BP3	147	133	90	368	608	322
AL391684.1	0	1	2	10	19	19
SLC9A3-AS1	35	25	24	116	106	119
ZYX	16210	15951	16452	9638	6918	8938
GUCY2C	1	4	4	17	37	28
LRWD1	4815	4405	4535	2441	1400	2447
WDR78	3	4	6	34	36	22
C2CD5	212	180	142	453	814	482
CCNYL2	71	51	63	179	274	198
ZFR	490	454	382	1080	1834	1073
CHD5	258	210	203	129	151	108
TMEM106B	48	49	56	175	296	140
LRCH4	548	496	474	279	251	320
ATG9A	1295	1358	1012	804	897	644
FYTTD1	321	279	201	723	1199	656
SLC4A2	12313	11727	11765	6626	3712	6101
CAPZA2	190	145	64	496	593	510
KIN	21	22	19	72	124	72
ARAP1	3726	3857	3165	2358	2009	2078
C1orf21	35	35	32	123	293	100
HES6	812	753	481	333	141	284
PWP2	1564	1406	830	698	689	698
DBT	57	68	52	161	355	196
DAGLB	1380	1349	1081	763	716	814
ATP13A2	3776	3957	3618	2443	1828	2154
LINC01444	3	0	0	24	22	8
PKN3	4481	4197	4531	2668	1541	2238
SNX13	46	29	16	128	226	102
SHISA8	208	173	197	84	38	87
SLC26A2	101	123	61	294	612	288
GET4	1130	1096	1459	746	400	549
UGP2	186	214	191	523	820	494
2022-09-02	1145	1038	1034	2616	4647	2529
PELP1	3561	3523	2718	2142	2070	1912
GALNT18	107	88	26	10	29	13
NEK2	136	126	108	322	518	333
TBL1XR1	146	166	94	376	804	393
TSNAX	54	46	36	148	200	136
CRYM	11	10	4	53	40	59
UFSP1	147	137	145	73	52	74
GPI	34153	31306	22370	17242	16937	16553
KLC2	1523	1453	1130	878	816	842
TEAD4	3001	3009	2984	1896	1491	1811
FAM227A	12	17	8	58	63	56
RBPMS2	373	391	341	220	158	205
TTC21B	98	69	41	233	329	226
REEP3	85	76	61	206	403	210
PROSER2	185	184	118	85	88	78
PTPN13	126	110	78	294	531	283
RNF19A	69	74	44	172	438	212
BAK1	3668	3061	4065	2001	1040	1758
MAP2K3	5607	5403	3421	2835	2637	2702
SF3B1	815	676	531	1626	3245	1698
PRMT7	2112	2231	2040	1256	840	1245
HDHD5	2541	2132	1969	1357	800	1182
SAC3D1	2177	2109	2240	1200	708	1219
2022-03-04	2144	1780	1013	766	1224	664
MROH6	199	204	79	72	44	51
TBX2	370	356	234	193	136	154
PDCD10	117	93	42	298	478	270
EYA1	6	4	6	23	67	31
ULK3	2038	1827	1466	1184	898	1015
ZNF24	197	145	66	472	718	454
RAB3GAP2	119	79	37	276	538	276
CCDC68	17	12	6	52	130	47
WDR11	243	244	161	570	1299	565
ABCB8	3203	2929	3096	1767	1025	1696
ZNF222	23	17	17	68	109	64
TECPR1	3225	3082	2968	1842	1195	1796
NDFIP2	104	74	56	234	409	218
ZMYM2	92	84	47	233	384	215
NOL11	215	200	142	475	843	480
NIPSNAP2	115	108	91	310	344	306
HSDL1	169	149	147	391	582	410
ATP6V1C1	193	184	125	425	971	462
POR	5725	5369	4195	3211	2283	2867
LVRN	18	12	10	55	73	50
UBE3A	224	175	174	485	717	482
MRTO4	4161	3890	2681	2212	1755	2041
TUBBP1	242	268	179	145	110	99
SELENOO	949	897	912	572	443	574
DHX34	1462	1447	1030	842	527	684
WTIP	1218	1434	920	751	556	653
TTLL12	3353	3261	2338	1851	1372	1726
SLC30A9	167	124	137	350	695	391
SCAMP1	87	92	86	231	425	249
AL590666.2	388	349	268	202	199	192
HSPA13	197	127	135	423	773	381
SLC7A5	10176	9848	10800	6393	7745	5814
ZNF296	750	659	544	422	351	388
EIF2S2	897	813	882	2090	2970	2082
PRR5L	79	68	23	17	21	11
TNKS2	231	164	131	508	1133	436
BOK	2494	2424	2151	1524	1061	1382
FNIP1	34	37	36	102	419	137
HTRA1	609	577	670	1958	1693	1739
DGKQ	835	805	762	531	392	474
FARSA	10284	9854	10594	5721	3034	5281
TRIM37	205	215	150	511	1208	482
IMPDH1	2930	2717	2037	1527	918	1388
TIA1	124	74	57	254	420	265
IFRD2	4379	4240	3854	2590	1530	2239
CAMK2N2	861	937	1210	558	268	461
C19orf47	2835	2499	2540	1775	1250	1500
GOLGA2P5	7	15	7	50	73	38
MDH1	501	441	431	1078	1686	1085
PUM2	233	215	221	552	1065	542
HIPK3	77	65	45	187	394	175
THOC6	2099	1709	1992	1165	651	1033
RUVBL2	11469	11187	12204	6771	3601	5874
TMEM30A	386	305	195	796	1443	766
SMYD5	1912	1672	1429	1126	1118	1039
FURIN	4962	4526	3147	2604	2960	2377
EFCAB7	12	10	5	39	49	52
VPS41	197	187	166	438	1012	484
CFAP70	51	49	50	152	247	137
SH2B2	425	396	432	211	76	174
RAP2A	81	77	45	221	323	184
CAPN7	148	84	84	304	483	296
INIP	111	108	93	286	471	258
QPCTL	3758	3593	3470	2304	1392	1975
TGFB1	24376	25634	24920	14947	9858	14000
LINC01529	23	22	21	5	7	9
REST	69	56	57	147	431	212
HLA-F	16	17	10	45	151	67
PPP1R13L	4859	4721	2498	2187	2637	2011
GPX8	265	200	178	578	922	491
DAPK3	5968	6084	5453	3647	2420	3347
DHX37	2546	2520	1652	1431	1307	1311
RABL3	31	39	38	123	197	103
MYO7B	32	28	40	8	14	14
TONSL	3380	3098	1981	1658	1275	1615
KIAA0930	1751	1827	1363	1127	837	935
ADCK2	2998	2919	3302	1814	876	1507
NELFB	9406	8665	8602	5488	3412	4939
SLC39A3	2264	2008	2011	1240	709	1179
SLC30A3	50	46	37	15	12	22
FRS2	57	47	27	126	281	153
SCP2	138	140	128	363	636	323
DCUN1D4	51	47	30	123	256	137
NAPEPLD	23	20	12	56	140	78
TFR2	173	124	158	83	59	77
PRPF4B	188	190	127	426	744	442
ZNF585A	39	26	43	107	214	127
TMEM161A	3700	3325	2985	1897	916	1703
NSUN5	4594	4259	4636	2906	2040	2622
CMTM6	284	244	255	618	1408	655
ARHGAP45	6647	6522	5211	3882	2584	3452
SMURF2	423	347	380	959	1777	857
TMEM163	14	24	9	97	128	47
PCMTD1	64	65	44	166	309	163
ZFAND1	161	123	95	319	572	355
USB1	2195	1903	1677	1158	1152	1314
SCFD1	62	64	40	161	236	175
BTAF1	174	148	89	371	880	385
FAM27C	67	59	45	29	12	19
KCNJ11	169	178	171	83	51	94
IMP4	4596	4485	3809	2839	2012	2505
LRFN1	978	1050	619	466	181	362
MON1A	1033	1007	1218	639	381	609
TPRN	1990	2337	2664	1462	1024	1307
ZNF410	2	1	0	19	19	7
FSTL3	1105	978	748	642	433	507
N4BP2L2	59	51	16	169	318	153
TOR4A	11392	11610	12811	7769	5374	6580
AHR	41	25	20	103	241	87
ZNF225	47	57	35	140	224	140
FZD9	254	215	209	115	76	130
DPP3	2909	2718	1986	1621	1464	1593
ITGB1	2113	1759	1797	4465	7821	4367
PPFIA3	1110	1044	831	588	314	537
ATF2	58	49	44	160	332	128
DPM2	2909	2608	2784	1765	1354	1755
CSK	4954	4985	4957	2993	1611	2651
ZNF213	801	656	755	497	357	429
NOL6	2127	2069	1114	1005	1235	885
CLEC2B	2	0	4	13	30	18
MAD1L1	3610	3553	3296	2187	1280	1951
TMOD1	18	19	17	68	135	54
PNPLA6	4169	4144	3364	2715	2163	2271
MED24	2500	2330	2095	1636	1623	1412
PPP3CA	187	195	159	471	601	457
ANGEL2	156	103	103	326	681	305
RAD21	890	761	669	1801	3606	1787
CPXM1	3	2	0	25	10	38
FAM83G	2374	2210	1782	1487	1459	1279
CCDC171	8	9	9	44	56	30
MICALL1	3304	3635	3042	2228	2156	2106
NAPRT	1307	1186	1521	678	236	566
DGKZP1	377	393	375	261	183	203
FPGS	6012	5784	6944	3448	1815	3322
CAND1	479	406	229	996	1661	984
DDX58	43	28	24	123	2359	118
ZNF628	296	313	323	153	120	195
TRAM1	562	555	427	1203	2728	1247
NKAPD1	117	96	127	338	409	294
RASD2	18	24	18	93	81	69
TELO2	3850	3629	3979	2308	1239	2057
A4GALT	342	298	290	193	120	168
KLHL9	71	80	67	199	331	195
TTC3	244	204	117	584	642	556
VIRMA	300	246	213	585	1158	628
CLINT1	353	308	332	842	1482	716
LYPD6	4	4	0	15	49	20
NPTXR	48	28	56	158	267	128
ASS1	46	63	44	294	140	241
RRP12	2935	3146	1652	1572	1557	1339
MRTFB	61	53	46	157	364	141
TEDC1	5622	4861	6701	3193	1603	2902
PIP5K1C	2016	2094	1626	1272	1209	1244
MYBL2	14379	14542	12984	7895	3533	6817
OSTM1	104	106	61	257	534	241
GBP1	11	5	12	45	231	38
ZCCHC10	34	39	26	106	133	113
DRAXIN	22	34	38	122	126	121
CLUH	7676	8232	5381	4482	3219	3983
RABGGTA	740	702	862	538	432	436
FHL1	398	362	498	1072	3927	1204
FANCE	1127	1020	696	608	624	572
OSGIN1	642	628	485	404	371	348
TMED3	3367	2791	2989	1747	936	1722
FNDC3B	165	151	137	399	811	344
MCM7	32543	31572	25256	18490	12374	17144
PDS5B	36	58	18	126	285	152
FAM189B	2996	3095	2966	2006	1691	1966
RPUSD1	3047	2657	3344	1907	1092	1642
SLC12A4	1849	1830	1266	1076	752	963
SHROOM1	532	460	349	265	255	285
KDM3A	211	148	219	506	1248	491
SLCO4A1	264	249	79	72	46	74
SHOX2	102	117	158	397	460	362
ADGRB1	1529	1574	1077	800	428	763
CECR2	3	4	0	20	82	13
INTS1	18554	20055	15971	11399	7738	10590
PFAS	3556	3442	1771	1725	1554	1550
CLPB	884	934	703	568	592	528
LINC02001	157	159	118	93	78	64
KCNQ4	66	74	51	32	32	29
TDRD7	63	48	73	193	882	185
PARM1	0	5	4	21	30	19
LY6E	3006	2542	2759	1799	1565	1852
TRMT2A	3071	2779	2895	1911	1010	1545
EXOSC5	5197	4501	3850	3064	2122	2622
SPHK2	899	813	798	555	340	487
THEM6	1561	1339	1420	849	374	730
ZDHHC18	2123	1990	1516	1153	958	1245
ZNF608	42	45	48	144	166	137
PTPRF	8981	9618	4487	4067	5030	3684
ZFP90	93	61	83	238	348	196
NME2	583	405	368	275	200	264
MRPL42	156	138	93	339	496	340
C11orf58	434	395	384	909	1435	940
ZNF354C	36	31	23	97	122	97
ATP2B1	166	113	110	342	667	311
SPOUT1	2062	1791	1493	1238	1147	1144
RIPOR1	4100	4174	2861	2340	2686	2308
ZNF224	38	26	10	103	197	83
DNAJC27	7	7	12	42	43	41
LRP3	1242	1267	1201	612	178	506
RIOK2	42	49	46	137	244	121
THOP1	8805	8238	7305	4982	2698	4476
ZNF417	12	13	16	50	110	46
LMBRD1	55	40	54	127	242	163
CAMTA2	820	757	669	539	492	468
LINC02454	15	10	13	44	97	45
SETDB2	17	19	17	59	103	56
SMIM12	1241	1056	1134	758	700	782
WDR46	4925	4691	3095	2578	1733	2460
ZNF507	181	174	93	382	858	418
IER3IP1	44	36	18	111	200	100
TCP11L2	15	9	11	49	75	37
GPR3	156	148	86	57	82	64
ARHGAP33	1456	1447	1425	1033	774	893
KYAT1	358	408	309	215	153	216
GRIN2D	2511	2885	2509	1623	918	1519
KLF16	4527	4448	5086	2802	1547	2645
CDC27	273	270	218	595	1316	596
DUSP23	431	335	515	254	141	217
FZD6	122	143	66	311	919	322
STOML1	892	891	1195	637	427	564
ANAPC2	3327	3273	2763	2125	1647	1994
AARS2	2157	1854	1394	1238	1000	1096
FOSL1	17139	15759	12200	7163	13630	6902
CIAO3	2035	1801	2159	1268	761	1176
TMEM126B	88	65	52	205	240	198
CCDC69	62	61	50	181	179	197
NXF2	11	237	191	14	21	18
ATRNL1	5	8	0	24	36	31
MICA	2908	2727	2296	1783	1226	1629
C20orf27	2839	2777	3110	1757	880	1589
PRKD3	130	134	79	311	608	285
ZMYND19	1816	1824	1687	1216	854	1117
GSAP	8	14	2	43	82	35
SCAF1	5483	5554	4307	3445	2532	3118
CBX3	508	465	293	1059	1713	980
DDX51	1410	1315	1133	899	803	856
AKT1S1	5228	4915	4870	3310	2024	2927
B4GALT6	115	100	67	257	540	233
ECSIT	2734	2657	3149	1716	844	1529
SRRM2-AS1	6	2	10	36	32	55
DPH2	1654	1515	1211	1049	979	923
TRABD	2136	1918	1576	1150	727	1166
NRAS	456	417	335	897	1514	934
DOT1L	2323	2313	1338	1294	1387	1073
ANKLE1	148	161	82	54	40	69
ZMYM5	40	39	26	113	132	112
RFT1	1395	1184	943	808	699	750
ITPRID2	548	476	316	1089	2216	1039
VPS35	412	330	464	971	1854	946
RELL2	227	214	181	140	89	103
PLS3	502	386	359	921	2051	984
HEY2	27	36	32	12	15	13
PRELID3B	331	269	159	652	966	693
DENND5B	279	261	255	618	1127	590
ADRM1	6597	5669	4819	3686	2448	3439
MSANTD4	45	70	42	160	237	153
TRAPPC13	40	48	15	119	170	150
RECQL4	3631	3464	3209	2116	1073	1923
CARD10	2720	2731	2583	1937	2014	1695
ARL6IP5	221	172	214	510	845	453
ADPRHL2	2061	1980	2056	1393	942	1264
ZC4H2	90	71	45	19	34	35
ZKSCAN8	152	132	120	311	842	348
EPN1	8869	8355	9604	5527	3115	5091
CASP3	138	95	85	285	433	260
DTX2	1303	1242	895	719	700	786
RDH13	252	218	195	141	159	125
SKA2	274	220	237	596	1021	524
AC092747.4	17	5	12	46	95	43
PACS1	4047	4317	3249	2661	2238	2471
THAP4	2455	2470	1738	1476	982	1329
COPS4	154	119	167	417	490	369
PPP1R2	161	153	101	361	669	324
DNM1L	344	314	252	686	1303	691
ZNF546	12	14	12	39	75	51
DUSP6	225	238	359	728	1163	736
NUP35	33	37	32	95	171	100
RAB33B	12	7	7	40	82	27
GPSM1	1216	1182	1129	785	470	710
LRRC45	1641	1626	1548	1085	730	1022
EDEM3	59	51	29	120	267	154
IFT57	178	174	115	407	491	437
STK17A	212	206	153	453	712	454
MIA2	31	24	32	78	173	96
DTX3L	58	58	77	184	852	188
HIST1H2BD	80	99	106	308	295	279
PPP1R3G	135	129	93	67	71	64
ARFGEF1	258	243	115	563	1171	540
TIMM13	6154	5621	6828	3926	2342	3612
GFM2	204	187	181	425	724	468
PSMA2	26	14	27	75	99	86
ZNF516	16	12	13	66	103	34
DOCK6	1300	1397	1163	820	497	794
RTEL1	139	70	64	48	31	33
DPAGT1	1677	1564	969	921	980	824
CCDC77	90	80	95	209	484	241
WASL	222	180	158	417	816	458
LINC00665	2658	2297	1853	1534	1584	1522
ARL4C	354	391	486	1231	1150	1131
ARMT1	93	102	37	257	384	239
MCM5	6673	6330	5788	4343	3514	4063
NLE1	1720	1582	1682	1047	610	1023
SNRPA	4002	3675	2991	2506	2020	2271
TXNDC9	78	64	29	183	261	181
TMEM128	93	90	112	259	356	267
BBS2	183	203	243	530	855	500
MUT	131	116	120	283	493	310
SPRYD3	2770	2442	2687	1912	2000	1677
CWC15	174	162	151	410	487	415
PRKCI	231	227	129	481	867	499
LHX2	261	225	215	134	142	156
STAT6	160	133	102	74	51	72
SUV39H1	711	709	556	441	424	448
DHCR7	3791	3826	2432	2243	1434	1874
STRN4	3227	2836	2627	2068	1628	1888
RAB18	103	87	68	212	418	220
EIF3E	1026	771	335	2579	2360	2651
SPAG6	4	1	2	22	19	13
SYTL5	7	8	2	30	60	21
EPS8	239	204	151	451	1377	512
CD164	710	691	433	1457	3383	1416
HIST1H2BN	4	12	17	57	65	51
MED16	3583	3686	3865	2562	1887	2364
XIAP	195	183	122	412	815	390
ZNF432	11	9	0	40	44	47
AL157392.3	7	1	4	21	45	19
JKAMP	116	94	84	221	485	265
UBXN4	415	413	304	861	1645	834
GFPT2	90	83	58	219	569	182
GNA13	203	138	84	378	780	381
KIFC3	6234	6235	5311	4152	3132	3751
WNK2	296	380	212	169	75	135
SLC7A11	45	35	60	148	370	124
INTS2	68	46	65	174	311	146
CDC73	75	75	56	171	380	180
PPM1H	49	82	85	217	459	196
C1orf159	1518	1271	1478	920	499	834
SRSF11	248	243	217	514	943	557
UHRF2	323	300	253	658	1243	644
WDR74	1944	1688	1564	1213	867	1125
EPHA7	10	11	14	37	109	45
THAP12	113	84	82	231	373	234
GGH	441	411	317	874	1355	885
BCAN	305	252	195	168	135	139
WDFY1	190	154	119	367	787	368
RSL24D1	438	373	266	1035	930	1010
UBXN7	400	325	273	759	1632	739
XRN1	91	62	38	182	537	179
AL627230.2	264	201	230	161	82	102
CDR2L	1003	986	544	484	248	442
ARHGEF1	7044	6443	4608	4044	3263	3774
SPNS3	4	1	6	41	29	15
MBNL1	181	152	72	368	974	377
MBD4	103	73	76	245	393	183
SPATA7	30	24	37	96	131	93
SEMA3F	47	55	27	21	13	16
RAB8B	61	72	44	153	266	169
JAK2	24	24	12	53	187	80
WDR89	15	13	5	43	76	39
AC007066.2	3	5	4	19	35	19
VAC14	2447	2427	2358	1722	1536	1649
BYSL	2027	1869	1530	1247	1015	1229
EPHB4	5535	5454	4821	3606	2384	3281
ARHGEF4	54	78	20	183	590	169
BATF3	395	307	306	228	145	193
ETV4	2492	2200	2674	1606	854	1408
SNX7	210	235	225	541	689	556
RIOK3	237	160	211	470	897	484
E2F1	3477	3539	3297	2377	1677	2229
CNEP1R1	44	34	49	116	226	119
STRN3	65	49	45	142	281	134
PRKAR1A	622	612	630	1350	3479	1438
INF2	8060	8393	6275	5149	3746	4735
NOTCH1	496	570	305	244	317	275
ZNF627	43	41	50	128	179	125
GOLGA5	177	159	130	376	579	354
SBNO1	164	148	100	321	569	354
UBA3	67	64	30	141	291	177
CDK19	192	166	166	401	860	398
IRAK1	33814	32166	32504	21115	12051	19228
DNAJB9	37	37	17	92	183	94
HLTF	227	187	79	505	797	461
SMARCA5	192	201	130	436	1052	399
C17orf80	94	76	49	207	314	185
TBC1D2	1199	1242	726	636	786	656
ZNF865	960	937	853	656	490	605
NFIC	3325	3683	3196	2328	2983	2016
MME	216	202	165	457	970	429
MIB1	146	188	98	347	727	396
ABCA3	5422	5804	4229	3602	2758	3219
SCAMP2	1670	1515	1317	1030	1112	1064
TERT	167	158	52	49	34	52
BROX	60	84	38	159	404	191
TBX2-AS1	115	90	65	47	45	48
ZNF566	41	36	29	108	278	88
RP2	70	72	32	179	296	160
PUF60	13555	12555	13038	8321	4374	7477
VPS13B	109	80	56	237	681	195
NDC80	301	237	210	566	888	572
MAD2L1	231	164	166	475	605	432
RAPGEF3	902	914	728	605	633	565
DARS	377	342	364	820	1576	766
SORBS3	3868	3489	4286	2600	1822	2471
SKAP2	135	101	137	288	648	319
ARRDC1-AS1	1113	1087	966	729	459	665
SNAPC4	1776	1540	820	838	757	790
SLC30A1	74	71	86	207	593	189
ITGA2	38	38	25	102	793	96
AC009948.1	30	33	35	88	181	96
EHD2	2875	2917	2663	2060	1471	1794
CWF19L2	11	13	8	39	68	35
DGKZ	3073	3300	3100	2132	1317	1968
PREX1	443	416	282	954	1187	867
ATG5	154	131	69	306	517	335
ENDOG	1376	1503	1725	950	451	849
LRP6	156	177	159	374	685	391
SLCO1A2	1	0	5	13	22	17
MT-ND3	26005	29053	16654	10471	8623	15726
DZIP3	59	64	34	150	227	147
VPS4B	185	124	150	370	762	351
PHF6	193	141	108	374	799	337
APBA3	1604	1294	1146	976	681	842
SIRT1	88	94	41	225	513	193
ANGPT4	4	2	2	9	35	24
TRUB1	104	78	34	218	390	222
NXT2	27	23	2	86	144	101
COL4A6	15	7	6	35	281	33
MTSS1L	309	343	241	187	123	178
STX7	243	237	211	518	882	510
LANCL1	217	190	100	405	895	466
LUC7L3	264	185	108	492	813	495
ST6GALNAC4	3375	3633	3719	2256	1143	2071
MMADHC	703	612	683	1519	2136	1436
PNPLA8	41	29	17	87	140	96
TRIP6	3058	2530	2369	1968	1540	1714
LYPLA1	692	567	466	1301	1826	1290
CYC1	19212	17500	23013	12094	5419	10195
TDRD3	11	15	10	46	56	41
NBL1	2232	2018	2139	1472	989	1392
TVP23B	103	93	64	200	534	235
ASAH1	94	91	92	215	440	231
PSME4	188	247	176	492	1210	471
ENC1	356	316	410	847	1720	791
UNC45A	5834	5726	5976	3762	1970	3416
NBEAL2	2381	2508	1733	1510	1245	1468
AC073857.1	1	6	0	11	39	24
POLRMTP1	86	168	150	78	47	54
DTNA	72	80	55	204	272	161
STAG1	107	96	100	236	547	245
PDXP	624	672	767	388	205	418
DOP1A	12	17	5	56	114	33
NAA80	413	330	306	266	205	186
ARHGAP24	28	37	26	78	159	100
KRT18	33399	29917	25749	19204	14346	19535
PLEKHG2	5167	5227	3703	3261	2940	3070
CREG1	38	23	39	91	220	102
RRN3	146	139	158	322	671	374
NIPAL2	18	30	13	63	245	70
AC009404.1	4	1	1	9	24	19
ZNF282	4149	3984	3755	2843	1853	2472
TYRO3	3205	3205	2436	1875	938	1701
ZNF217	277	283	365	753	1495	687
SLC37A2	25	41	42	113	431	102
EFR3A	329	279	154	613	1229	645
NCAPH2	3658	3361	4255	2358	1256	2210
EHD1	8516	8498	5993	5374	5575	4724
RPRD1A	184	160	116	339	686	385
P2RX5	115	142	75	36	58	65
CCNT1	225	199	212	505	1209	455
IQGAP2	5	7	1	15	66	29
AIDA	181	157	134	336	702	389
LDHB	277	200	223	427	965	856
VPS18	2351	2398	1820	1577	1147	1409
PGAM5	3419	3543	2535	2272	1767	2019
CDKN1A	4351	4187	3272	2605	3493	2390
IPO11	128	97	103	248	490	271
KBTBD2	272	237	242	557	1189	547
GNG5	877	669	651	512	619	456
COPS5	550	471	469	1137	1388	1156
UBALD1	1390	1367	1134	982	757	838
POLR3H	1419	1275	1184	948	679	849
GTPBP3	1247	1225	1002	831	771	808
NR2C2AP	864	752	625	579	509	449
ELMOD2	35	40	23	106	141	88
PIM3	2220	2162	2424	1709	1578	1467
TIMM50	17880	17938	16349	11490	7332	10945
TRMT1L	52	38	35	119	229	102
PPP1R12A	167	137	108	319	663	322
GTF3C3	155	157	160	338	606	403
RCN3	1163	933	719	586	267	504
XYLB	149	159	128	103	73	70
SLC39A4	1081	913	1000	712	418	603
B2M	2255	1770	2229	4960	17791	4949
GNAO1	45	32	34	14	25	14
GPSM2	110	105	110	292	387	240
TTN	15	3	8	38	102	33
LRPPRC	495	480	277	972	1889	976
IFIT1	11	17	24	61	3093	75
IRAK4	172	167	130	372	724	342
KIAA1143	169	149	129	360	571	325
EPOP	644	564	461	376	247	352
TAF9	205	179	174	436	822	394
HRAS	2314	2168	2659	1608	867	1388
CDIP1	1062	929	1002	702	423	622
SYF2	161	139	158	359	660	340
IRF3	3615	2950	3002	2285	1279	1856
CARM1	5563	6109	4685	3845	3209	3610
CREBL2	364	311	450	880	1438	876
TXNRD2	2287	1936	2115	1443	1068	1458
STAM2	102	103	65	223	398	225
RIPK4	905	927	638	2073	2270	1935
ZBTB11	42	57	36	110	245	138
CD47	348	305	374	777	1701	744
HBS1L	308	252	224	614	813	583
URM1	4906	4630	4814	3179	2122	3167
SHOC2	72	70	26	166	339	172
NEURL4	1469	1410	938	928	704	772
EIF2A	188	194	216	485	643	469
HSF1	8377	8654	8547	5923	3633	5216
ARGLU1	269	205	207	548	873	465
CXXC4	14	10	7	39	67	32
DDX60	12	9	12	18	828	51
MPDU1	2326	1925	1501	1348	1230	1297
TBC1D15	102	75	64	185	469	210
INO80E	3360	2851	2521	1996	1262	1870
TENT2	51	40	20	105	406	111
TGIF1	540	553	615	1379	1813	1200
RPS6KC1	58	43	30	117	395	119
KYAT3	70	38	51	146	244	139
ZNF84	30	25	5	71	170	90
PTER	26	19	33	94	107	76
CKAP2L	137	118	98	264	569	283
NORAD	1206	965	820	2121	4686	2190
AKAP3	17	5	21	58	152	52
RANBP6	89	80	65	221	294	173
HSF2	76	82	78	183	380	200
KDELC2	151	157	173	363	838	377
HSDL2	207	176	149	426	567	406
TICAM1	986	828	710	631	536	553
AC011445.1	59	65	25	25	17	15
AHI1	46	30	17	110	131	95
ABLIM1	15	19	11	41	187	55
GRINA	4583	4400	4492	3165	2356	3028
PICK1	847	778	911	601	391	537
METAP2	290	245	196	527	1128	553
PYCR3	1707	1498	1994	1103	542	998
TBC1D13	2023	1981	1433	1333	1377	1164
DDX11L2	177	134	141	104	69	79
CACUL1	299	285	299	639	1319	640
BAX	2107	1963	2353	1510	950	1345
MIIP	1681	1505	1608	1243	954	1034
USO1	227	210	126	449	784	445
MESP1	246	200	217	136	49	101
GTPBP6	2295	2030	2419	1523	905	1422
ACVRL1	5	10	14	34	56	49
NDUFS4	87	75	87	233	258	212
MOSPD1	44	52	39	119	225	115
KDM5A	379	510	429	968	2029	1004
WNT10B	186	160	133	104	83	95
ELFN1	358	368	259	229	260	173
CAPRIN2	177	162	123	346	1023	365
HEATR5B	109	82	69	220	442	197
SRP72	304	258	207	582	1017	545
MOB1A	507	388	323	832	1710	952
LEPROT	220	198	247	517	956	483
SCAMP4	5032	4906	4014	3445	2591	3003
MBTPS2	140	116	95	270	585	272
TAF6	4306	4161	3926	2795	1788	2726
ARMC1	280	200	202	518	815	502
AL355994.2	79	52	69	32	18	36
MGC12916	85	89	36	31	35	29
KLHL24	80	70	71	189	461	166
KAT2B	42	59	38	120	227	130
TET2	51	33	24	112	292	89
SYMPK	4147	4165	2761	2573	2377	2425
NR1D2	112	67	68	220	510	188
EPRS	581	560	782	1455	2698	1497
RFC1	284	278	269	636	1028	566
CAPZA1	442	346	247	841	1615	714
AL449212.1	3	5	7	21	43	21
LINC01896	276	245	164	124	36	94
SSNA1	8349	7413	8933	5199	2569	4800
MSTO1	459	539	393	317	230	300
C19orf24	4584	4377	5965	3044	1580	2917
R3HDM4	2838	2514	2811	2004	1438	1799
LRRK2	62	50	24	131	345	125
ZBTB6	8	24	14	60	128	50
ZBTB26	45	48	27	107	203	111
NFE2L2	158	157	159	407	918	316
MED22	2903	2600	2515	2007	1699	1848
PARP14	95	90	54	223	1254	191
AASDH	28	16	13	55	103	64
C1GALT1	64	62	34	140	257	145
SAMD8	99	121	94	272	634	226
ATAD1	188	138	166	368	782	372
GOLT1B	237	188	151	424	1046	439
ZNF841	8	13	7	52	63	24
LONP1	5776	6187	5608	4379	3278	3770
NSUN3	11	13	10	38	64	36
COL4A3BP	75	83	63	164	442	196
TTC7A	1597	1524	1181	1119	953	919
NCOA3	179	180	181	397	1169	417
PPP6R1	4502	4599	3550	3141	2290	2682
PKM	114846	106020	99076	75113	55430	68900
TESK1	978	959	958	714	613	679
AC044860.1	117	81	76	56	54	46
ZNF510	25	25	16	67	130	59
PLEKHA1	126	116	85	243	644	268
TRDMT1	27	35	18	86	105	84
TRAF2	2694	2550	2305	1842	1337	1709
NPHP1	47	43	66	196	149	185
SP3	178	198	113	385	810	385
AC011043.1	15	12	14	51	53	46
ZNF486	11	7	14	42	59	34
DNAJC10	344	289	213	654	1324	591
BCLAF3	20	6	10	41	87	45
SLC35F5	264	188	110	457	1004	475
PARD6B	7	5	0	19	42	20
GLB1L2	800	780	426	412	270	400
RNF2	70	88	47	190	262	183
NOP16	1399	1280	871	772	646	822
RAB27B	10	33	14	78	127	67
CHMP2B	69	43	56	155	247	134
ZNF10	8	4	5	28	35	20
ZFP62	63	54	41	127	227	144
LHFPL4	1009	944	598	580	492	554
IFIT5	55	36	15	115	304	106
WDR24	1218	1273	1203	899	570	796
PTBP2	19	8	4	47	72	36
DVL1	10106	9845	9328	7164	5995	6590
ARV1	49	38	26	100	166	109
ACADM	164	149	96	304	657	338
CDK18	57	57	45	197	131	209
FOXRED1	1612	1342	1306	1025	624	909
TCOF1	3864	3776	2854	2053	3443	1902
MFSD12	2084	2106	1710	1286	1904	1187
POP7	3343	2987	2547	2148	1447	1937
MAP4K3	69	64	33	153	324	141
IMPACT	135	139	124	310	547	290
ADCK1	338	312	268	230	182	184
TBL3	4435	4654	4403	2959	1412	2629
MDC1	3188	3469	2446	2056	2560	1985
DUS1L	2817	2646	2011	1864	1483	1644
BZW1	1258	1215	858	2445	5137	2333
THUMPD1	78	59	40	148	433	153
KATNB1	2467	2597	2473	1855	1212	1626
PAIP1	349	331	318	731	1352	676
NSA2	279	221	169	594	580	612
FBXO8	43	56	44	114	209	141
DMKN	49	70	61	196	194	161
LUCAT1	19	14	16	58	180	40
SLC25A36	148	152	72	296	627	340
AKAP10	143	99	131	296	618	281
DDX39A	7622	6915	6210	4902	3388	4580
SEPSECS	54	32	37	115	196	103
TCEAL8	313	213	303	738	771	678
TMEM135	54	53	67	130	302	171
SPC24	2120	2345	2435	1618	1122	1543
ABI1	163	111	178	383	711	339
MPHOSPH9	52	73	26	137	307	164
SYP	106	125	103	47	25	67
ANAPC10	6	5	7	31	24	33
AIMP2	1050	970	784	690	579	648
STAU2	207	191	163	417	661	412
DENND4C	87	74	28	196	482	170
HIGD1A	194	129	144	376	475	391
STT3B	459	441	293	862	1679	875
WDR75	108	144	68	284	453	278
MRPL4	3761	3260	2710	2242	1224	1977
LINC02432	61	40	39	126	171	130
PTPN2	108	124	80	255	443	242
ABCD3	102	95	58	225	295	222
PACRGL	43	45	39	103	204	114
AP001972.5	10	32	22	88	102	80
PMPCA	5621	5616	3939	3605	2135	2996
PTGES2	5612	5202	6178	3634	1671	3238
GMDS-DT	33	38	30	99	119	97
ARMC4	7	6	10	22	86	34
RBPJ	175	204	203	450	755	426
GRPEL2	98	112	135	266	571	289
SLC10A3	2276	1980	1823	1490	1109	1400
BBS12	14	10	2	42	58	31
EDRF1	55	54	54	122	255	151
FAM126A	124	98	82	226	481	245
WDR18	4295	4304	4609	2805	1468	2759
TIMP1	7232	6521	7307	5106	3834	4681
LY6K	40	51	11	14	4	5
NOSIP	11193	9998	14581	7046	2894	6232
POM121	2958	2787	1839	1502	2336	1474
EEF2KMT	399	336	330	233	195	252
ZNF385A	1370	1279	1442	997	634	886
NUCKS1	1013	944	1069	2124	4539	2152
APOLD1	72	62	57	153	303	152
AQP3	59	43	43	23	9	24
DMWD	7465	7096	7183	5369	4362	4930
ZDHHC8	1680	1895	1493	1204	980	1203
KAT2A	2086	1929	1310	1252	942	1171
CCNL1	162	179	114	363	749	331
COG6	47	25	12	90	183	95
RICTOR	38	43	14	96	232	99
CNOT3	1529	1495	1138	1033	1045	956
PRRG1	40	19	21	84	157	71
GMIP	1946	2111	1641	1286	765	1247
PIEZO1	7270	7251	5092	4398	5707	3929
EIF5A	24436	21565	15950	13778	10109	13558
C8orf58	535	558	361	362	297	286
ZFPM1	658	886	813	568	458	514
MYH15	48	43	41	116	219	104
POM121C	3385	3412	2576	1890	3047	1863
WSCD1	286	313	284	207	137	184
ALDH16A1	1698	1603	2160	1328	952	1154
NEPRO	109	87	72	214	331	216
CKB	14900	14413	15025	8507	3218	8019
SLC35B3	96	96	72	191	374	229
NCKIPSD	1182	1205	995	846	778	801
MDH2	17969	17576	16109	11702	7600	11408
IFIT2	18	24	26	55	5540	63
MAP1S	3342	3514	2712	2395	1894	2150
RRP8	405	291	272	243	215	181
NCKAP1	450	397	218	842	1732	805
PPP1CB	234	205	103	450	1023	433
KCNT2	4	3	3	20	28	12
CSE1L	578	480	377	1038	2168	988
LZTFL1	38	27	12	82	165	76
SAMD1	3204	3231	2286	2018	1128	1781
RSRC1	51	56	56	127	214	156
ZNF277	53	34	11	144	125	154
TSR3	3596	3498	3153	2467	1549	2245
PRPF38B	119	118	113	241	471	300
CUTALP	78	81	79	209	341	169
EEPD1	246	245	140	118	110	134
SPG11	181	140	131	337	837	329
NRARP	152	176	85	75	54	76
CPNE7	1726	1674	1543	1247	770	1060
B4GALT2	3177	2934	2917	2145	1225	1927
CARMIL2	252	256	176	154	98	134
MTM1	27	29	15	62	130	76
MAP3K1	10	19	9	37	112	47
NUBP2	7206	6350	10948	4766	2073	4217
GTF2H1	143	109	115	283	434	280
PIGK	95	75	49	188	295	183
CWC27	67	35	34	129	217	117
PMAIP1	128	121	125	296	3280	288
SAMD13	9	4	15	41	50	37
SMG5	7737	7961	6328	5362	4728	5072
ZNF572	11	10	3	36	40	30
AC133548.2	49	39	80	33	17	16
ADAT3	505	470	521	356	183	292
CHPF	2529	2227	1713	1596	1332	1479
LRRC49	30	17	27	73	97	79
SNX8	3785	3763	4190	2916	2005	2547
OASL	53	38	74	158	11169	133
PPP1R11	2196	1747	1950	1445	1597	1377
LINC01816	34	31	37	22	13	10
ABCC10	1269	1197	900	822	832	785
GNG12	696	552	540	1269	2744	1201
YRDC	693	628	506	412	569	370
C5orf15	182	145	199	385	961	405
LETM1	2561	2718	1620	1684	1538	1422
OAS1	6	8	0	21	304	22
SNRNP70	7976	7479	5034	4844	3336	4269
U2AF2	10582	9429	7536	6737	4878	5969
HELB	13	23	18	56	170	51
ABCA1	86	58	82	188	489	174
MAN1C1	3	5	4	29	23	15
PTPA	12612	11776	11476	8341	5105	7789
ZNF14	9	5	11	32	66	26
CIR1	17	24	32	67	108	101
MTMR6	71	54	27	130	272	152
RBM38	1870	1625	969	993	788	956
CNOT8	358	277	280	625	1046	682
MYNN	30	42	17	77	150	111
FLNA	106546	115138	70547	64056	73207	59446
C19orf25	3395	2956	4063	2413	1560	2234
AC016734.1	912	1077	1017	742	406	600
RNF11	315	284	320	664	1081	644
DISP2	1086	1098	517	529	313	520
TAOK1	174	176	101	328	837	371
FAM110A	678	535	716	457	370	441
HBP1	154	93	165	331	603	344
ZNF580	842	695	995	541	372	578
ATG101	2363	1966	2628	1588	780	1365
PSMD2	24243	23710	18791	16030	13695	15159
CENPB	5280	5628	6025	4059	2496	3588
BLOC1S6	128	121	70	278	405	248
PPIL3	98	86	62	222	239	227
PFKFB4	758	694	426	464	371	362
KISS1R	32	38	10	11	8	6
TMX3	115	106	47	222	561	243
ZNF33B	56	59	74	186	266	139
RAVER1	2592	2586	1606	1556	1437	1544
TWNK	935	847	713	562	799	527
PPP1R12A-AS1	3	2	0	23	18	6
CUL4B	204	237	156	434	957	446
AKR1E2	174	153	89	81	98	66
ZNF230	27	47	38	102	185	106
TRIM23	28	26	17	75	117	58
NUP210	4427	4403	2446	2573	2782	2169
MT-CO2	103174	85460	64091	54364	42577	56872
AGAP3	2777	2873	2667	2063	1339	1851
BCAP31	10157	9720	9232	6596	4552	6776
SCYL2	121	64	60	205	607	199
EDIL3	11	12	7	48	32	50
ZNF37BP	37	23	8	86	166	68
BBS10	117	80	36	225	438	214
RAD51AP1	102	106	32	244	483	235
VARS2	3043	3046	2790	2140	1130	1833
ENTR1	2443	2359	1477	1460	1394	1414
2022-09-07	395	342	208	747	1267	675
MLLT3	84	73	51	211	227	161
PTEN	263	227	194	486	838	487
RNF126	2670	2458	1919	1699	1518	1702
LONRF1	43	46	76	173	314	131
ARID2	286	243	212	504	1090	540
KRAS	307	231	170	532	1057	510
CC2D1A	2969	2871	2410	2088	1427	1840
LRFN3	2503	2813	2460	1882	1185	1725
GTF3C5	5118	4743	4448	3606	2555	3208
MAPK8IP2	558	674	524	373	186	364
ANKS6	1331	1446	1018	931	1047	839
LINC00909	54	37	56	118	212	139
TRIM59	62	80	59	163	366	158
ZNF787	2231	2560	2942	1743	919	1581
ZYG11B	74	99	79	220	397	181
CMIP	749	791	659	518	667	491
CEP89	3657	3286	3044	2397	2897	2325
AL050341.2	24	17	13	64	79	47
METTL1	628	475	424	370	340	347
ANKH	1003	977	890	728	853	631
SP100	106	91	113	246	587	225
RNF13	79	61	48	136	315	170
PNKP	955	859	1101	727	414	585
HAUS5	5428	5005	3773	3528	3360	3194
USP38	57	43	38	134	268	96
SELENOT	669	459	457	1200	1622	1101
PLK3	377	261	342	227	105	173
MEPCE	5350	4897	4440	3777	3465	3371
CPEB4	72	48	50	138	354	134
MTFP1	140	108	159	81	43	76
ANKMY2	59	58	47	148	222	121
PLXNC1	11	8	5	34	131	20
FAM111A	117	97	110	262	624	223
CHURC1	85	68	41	205	190	194
SLC7A5P1	1	3	6	26	27	12
TMEM104	1536	1452	1159	1061	840	963
UBA2	1954	1748	1690	3741	6352	3650
TRIQK	71	60	26	147	250	150
CCNT2	70	75	40	177	362	134
MIER2	1136	1092	904	799	611	728
SBF1	6745	7685	6361	5187	3502	4493
ANO7	131	97	68	47	45	62
PGM3	169	139	149	328	483	374
SLC44A5	5	10	4	28	72	19
ATG2A	2023	1979	1691	1490	1444	1322
EEFSEC	823	901	868	622	374	573
NSMF	4367	4138	4124	2781	1366	2651
RBM14	3599	3669	2861	2529	1961	2342
PPM1D	48	50	58	127	304	127
DENND4B	1887	1707	1321	1272	1064	1115
CLCN3	190	172	129	345	744	369
POLR2J3	39	38	30	15	22	19
ALG5	129	98	97	286	304	265
XAB2	5764	6067	6133	4471	3502	4124
SOCS6	126	85	83	216	412	239
DNAJC21	234	213	212	480	682	482
ITM2B	805	706	855	1614	3134	1670
PCYT2	1991	2009	2196	1551	1019	1377
C8orf82	1627	1509	1789	1222	732	1056
KNTC1	108	122	58	209	578	273
GNAI3	354	373	280	731	1242	679
ITPK1	2506	2543	2090	1790	1940	1678
DHX30	6892	7044	4885	4524	3348	4173
EIF6	15280	12639	17574	10163	5522	9212
TRAF5	38	31	14	96	176	67
IFIT3	40	27	32	75	4740	83
TMEM250	6046	5874	6660	4664	3357	4101
FEM1B	104	122	82	236	440	238
YIPF6	339	229	222	566	1115	560
DUS2	482	452	367	309	242	304
DDX6	450	468	564	1096	2183	1018
TRAPPC11	74	89	70	195	393	167
NCOA4	597	517	750	1403	2805	1312
HSPBP1	2004	1818	2188	1356	707	1282
CAB39	228	204	236	451	1282	508
PEX2	396	360	318	918	864	833
BACH1	122	106	63	211	570	251
RABL6	7638	7564	6048	4974	3129	4729
ZNF248	12	18	9	41	73	41
TRMT11	32	40	8	95	222	89
ZC3H15	109	116	54	222	388	267
WAC	263	245	274	539	1150	561
YPEL2	27	29	28	76	129	72
TMEM59	505	380	496	980	1632	975
NEDD1	62	50	27	127	269	115
UPP1	2338	2326	2937	1868	1868	1726
EIF2AK3	37	34	20	79	152	84
RNF208	561	530	712	377	190	374
MAGT1	375	317	351	686	1726	762
TMEM151A	87	117	75	66	47	35
SART1	5067	5162	3673	3376	2298	3057
RAB1B	5682	4868	5424	3770	2328	3569
ZNF397	67	63	66	164	233	154
FOXD2-AS1	256	293	224	198	140	148
PRELID1	10646	10516	9388	7659	4282	6188
AC012467.2	3	9	5	29	48	17
CMTM7	823	813	712	571	454	577
PITPNM2	906	901	597	583	615	535
RBL2	197	159	151	381	902	341
TLX2	55	45	50	28	7	20
IMPA1	177	167	55	384	676	385
ABRAXAS2	67	65	74	169	326	153
DHCR24	6255	6616	3172	3450	2984	3228
ZNF75D	49	44	30	110	194	97
TRANK1	13	22	18	56	599	36
SIPA1L3	4488	5045	3272	2936	3854	2450
CPNE8	293	188	123	453	874	524
MCRIP1	6103	5710	9098	3915	1263	3381
GSTCD	74	76	75	193	261	169
ATP2B1-AS1	15	5	9	39	63	28
RBM7	55	39	13	120	169	126
STK38L	136	118	88	255	551	252
C11orf74	24	17	10	52	72	57
RAP1B	814	612	437	1340	2187	1381
GYS1	1342	1353	939	866	619	840
GPATCH11	91	59	54	216	201	171
NUDC	8712	8058	5694	5237	6011	4969
PDZD2	3	0	2	24	46	3
WDR48	198	154	176	389	769	363
RWDD4	30	29	19	82	128	60
GTF2A1	250	216	180	457	953	447
ATF7IP	181	199	220	416	1016	456
TMEM167A	319	286	204	556	1005	604
MKKS	70	48	44	130	212	140
RABGAP1L	60	45	28	120	195	114
EPB41L4A	13	18	8	41	123	38
CHAF1A	1779	1631	1536	1094	1675	1052
ZNF180	53	39	17	105	161	121
SOD2	326	263	248	584	1899	593
RELCH	88	91	89	219	484	184
ZNF532	73	73	79	161	406	186
SRGAP3	12	4	3	28	37	25
NPR1	88	92	53	46	37	42
RNF26	3225	3017	2337	2176	1710	1989
BPTF	195	199	146	377	927	394
IBTK	120	107	66	231	611	220
SF3A2	4902	4828	5528	3708	2082	3192
QTRT1	3361	3116	3581	2455	1389	2151
NEK7	63	67	20	150	299	150
NRM	2102	1939	2110	1476	941	1429
GGNBP2	157	141	132	312	608	302
CAMK2D	149	100	114	245	599	297
ZBTB45	542	584	519	390	245	374
SESN3	16	24	7	62	70	53
KLF9	69	57	56	144	261	140
NHLRC2	89	75	49	159	426	177
PPP1R12C	2711	2444	2705	2101	1475	1728
SETD2	137	163	111	293	692	314
ZMYM6	21	10	16	50	104	42
ADCY3	1610	1442	890	869	1110	821
TRIM28	19413	21592	17576	13839	8198	12589
UBE2S	14225	13676	17963	10375	5269	9104
PPP2R3A	25	31	20	81	144	57
CDC40	202	144	85	350	544	374
AC010616.1	179	147	127	101	69	94
PRR19	436	416	322	287	199	259
FUT8	240	191	193	463	1112	410
UBAC1	2886	2608	2042	1859	1575	1820
C5orf51	85	76	63	149	476	196
EVL	1789	1940	1931	1289	565	1129
ORC4	127	86	52	229	320	250
MAPK8	134	92	70	228	609	226
TUFM	25347	22260	20506	15615	8070	14188
TAF1D	111	108	82	228	371	229
TUG1	379	262	252	612	1586	637
XPOT	1061	961	997	2020	4589	2049
PPP6R3	249	221	196	485	1011	437
MFN1	154	125	90	282	529	270
TMEM259	8201	7720	7095	5734	4184	5347
PPIB	5121	4254	3560	3216	2021	2800
WDR35	94	65	60	164	364	174
OSBPL9	273	237	267	516	1045	568
NGFR	28	27	25	78	88	79
WDR62	7261	7293	5196	4798	4366	4607
CPEB2	17	18	12	52	182	36
SECISBP2L	91	116	75	213	439	222
ERMAP	41	32	19	91	164	74
CLEC2D	4	3	8	18	39	22
TMEM123	557	474	275	966	1985	956
AC006077.2	12	25	25	5	12	6
MRPL12	1842	1569	1572	1156	657	1138
ARHGAP12	49	62	38	120	223	129
ASL	2811	2628	4469	2034	992	1892
ATG4D	1359	1336	1843	1053	532	908
RHOU	17	13	24	77	81	45
REEP4	1944	2011	2350	1649	1465	1423
C15orf39	650	645	488	376	552	407
AC006538.1	65	77	63	35	26	44
TRAPPC5	168	103	109	70	26	65
PPM1F	5361	4768	3090	3210	2364	2814
CCDC61	295	261	285	200	134	186
SNX11	1841	1606	1772	1348	984	1226
TUBB4B	34411	31287	24761	22050	15361	19971
YIPF5	228	176	260	505	822	485
FCGR2A	11	8	3	34	48	21
MAN2C1	1434	1239	1235	1010	561	825
RFX3	28	27	26	91	125	57
GPBP1	152	114	68	270	592	256
SNX14	362	327	160	675	1144	678
USP16	72	67	21	156	288	166
DCBLD2	2273	2250	2348	4857	12202	4613
SNRPB2	169	97	80	302	369	310
G6PC3	2928	2767	3073	2087	1275	2013
UBTD2	117	104	113	234	445	260
AC010894.3	12	10	6	31	44	33
SLC35C2	2790	2473	3234	2064	1367	1916
CTDSPL2	160	111	56	286	524	280
MRPS2	4227	3890	3765	2942	1979	2774
TAB2	233	204	190	429	874	437
DNAJC13	209	164	93	381	1026	338
NAB1	110	97	66	217	496	195
C9orf72	33	18	16	67	113	59
CPD	116	172	118	298	757	315
KIF1C	5395	5289	3562	3569	3180	3168
SCAP	4438	4780	3749	3247	1862	2749
BARD1	57	48	33	107	311	115
ZNF189	24	31	9	59	119	83
ADD3	42	37	7	104	254	96
PIK3C3	110	81	130	263	496	238
FAM83H	573	565	459	411	432	359
NF1	177	158	104	307	832	336
HIF1A	253	179	134	379	1081	453
AURKAIP1	12229	10325	10896	8201	5000	7363
KCNQ2	35	25	23	15	7	13
ZDHHC20	133	124	44	246	526	319
PSMD10	286	250	329	638	891	653
BAG6	18461	17623	14440	12108	7657	11268
GALNT16	838	706	493	440	257	450
ARFIP1	51	53	41	98	238	142
EIF3B	14114	14442	9389	9161	8483	8434
MYO6	131	131	89	239	651	279
TTC37	100	109	41	232	402	216
NUP133	209	138	173	401	720	350
SSSCA1	2393	2061	2181	1553	788	1441
TCEAL1	120	81	125	272	373	257
MGA	194	196	141	379	884	371
TMEM198	93	79	69	48	45	51
CKMT1B	67	78	105	52	47	42
EIF2AK2	239	258	168	459	1114	485
TMUB1	3675	3368	3669	2721	1620	2344
RRM2B	120	82	30	212	464	244
SENP5	214	194	191	418	1088	410
POLR2M	99	89	46	178	401	205
SEC23A	215	233	173	425	755	459
RBMXL1	70	62	92	208	336	158
RPSAP52	7	8	6	24	50	22
PAQR3	88	60	34	168	300	147
CYLD	57	69	43	128	423	139
FADS2	1109	1123	983	763	677	839
ACOT7	10455	9784	9756	7277	4541	6802
FBXL6	1151	1022	813	757	457	652
ZFX	55	43	23	149	272	77
DDX3X	901	896	594	1605	3798	1684
CRYZ	94	84	57	181	327	183
KDM6A	71	60	53	139	488	140
PHKB	223	193	224	491	658	443
ASB6	2083	1837	1429	1406	996	1194
FOPNL	192	206	148	410	552	412
TTK	116	113	67	225	500	225
CEP44	23	34	11	83	106	65
TWSG1	237	184	162	411	697	415
ACD	1772	1667	1622	1212	595	1082
PPFIBP1	854	795	844	1772	4499	1591
TSEN54	1546	1435	1398	1118	715	1017
DPP9	5412	5373	3884	3374	4395	3261
LIG1	1879	1711	1540	1369	1189	1236
SMAD5	100	116	82	235	443	209
TBC1D10B	6545	6271	6241	4630	3249	4551
KLF12	12	20	12	59	94	33
MPV17L2	1236	1171	902	878	740	769
MFAP3	81	67	83	170	339	182
ACTB	92776	98289	75082	64402	67067	60823
ACBD5	101	82	68	188	389	185
COQ10B	93	84	84	185	542	197
ZNF414	998	960	1316	802	457	682
AL139393.2	12	2	10	39	37	33
RLIM	244	231	129	435	1044	456
TAF1A	13	12	15	42	79	35
DDX60L	15	12	14	40	224	33
ERGIC2	115	92	29	253	344	256
ZFP82	67	70	53	137	315	154
FAM27B	100	95	103	58	41	66
ATE1	84	108	88	208	415	214
TNKS	169	153	174	351	789	346
ANKRA2	38	37	24	81	199	83
COMTD1	1379	1232	2015	996	478	915
COMMD4	2691	2539	2347	1945	1349	1797
ASCC3	144	113	55	264	444	270
TOR1AIP1	122	115	83	230	767	237
LOXL2	3957	3662	1868	2042	2219	1947
PAPOLG	46	43	63	125	262	125
PAK4	17524	16927	15152	12531	8551	11218
ZNF271P	76	58	58	173	214	141
SF3B4	4324	3843	3351	3072	2660	2680
CYP1B1	38	35	20	77	234	80
POLG2	59	56	50	125	230	132
RPAP1	1653	1709	927	945	685	966
CEP70	48	30	29	109	112	100
USP37	46	50	27	105	260	98
SNAP25	29	47	53	134	135	156
ZNF557	29	15	11	62	94	49
MANEAL	406	390	311	286	292	237
SELENON	3970	3884	3312	2958	1777	2387
SGMS1-AS1	4	9	16	37	71	35
SLC16A3	6387	5963	5026	4619	3528	3933
ZBTB1	28	67	33	133	224	117
RNFT1	62	13	22	99	235	122
CDK1	481	322	124	854	1466	922
ZNF75A	39	48	35	95	194	105
POT1	46	26	9	100	152	85
ZNF436	79	78	66	178	377	153
C7orf26	915	893	810	695	546	629
TEKT4P2	224	182	158	135	82	114
TBC1D8	41	40	38	93	305	94
UHMK1	383	350	158	703	2170	672
MED7	43	34	50	123	139	113
TBC1D32	32	17	7	52	118	76
ITFG1	101	128	123	260	449	273
AC125257.1	12	7	7	31	66	23
AKAP7	31	35	18	71	135	80
SENP3	2177	1750	1520	1290	673	1186
PLEKHO1	334	315	198	167	120	196
PPIL4	112	76	54	183	330	210
APEX2	1789	1755	1449	1314	913	1163
MON2	150	132	82	263	693	275
ZMIZ2	6886	7121	6792	5290	5410	4974
CDK17	126	84	61	200	589	215
PPP1R14BP3	730	578	698	517	244	383
KCNK15	10	18	21	7	6	5
TEDC2	1473	1332	1202	959	559	936
SLC9A3R1	2463	2162	1861	1604	1037	1529
CAMK4	46	31	28	101	137	82
CHUK	127	64	59	204	391	205
TENT5A	20	46	20	85	241	79
SGTA	11467	11606	12009	8208	3903	7250
MPP5	237	197	156	445	703	390
TNIP2	3054	2941	2210	2139	1865	1942
PRR5	35	19	34	16	6	12
NUFIP2	192	152	137	341	731	328
TFCP2L1	13	20	10	42	122	40
SYN1	70	75	86	37	32	53
SRF	4102	3925	2820	2784	2479	2523
RARS	680	577	528	1181	1900	1211
WDR47	66	57	37	118	295	135
RHOT2	3924	3617	3667	2774	1591	2526
MVK	676	637	580	454	346	478
PAXX	2845	2429	3196	1958	933	1769
HPS6	1951	1835	1498	1370	817	1171
CLTB	7621	6963	6370	5264	3268	4740
IPO8	383	388	545	974	2216	917
TRIM47	893	859	633	609	709	510
IDE	149	157	74	280	675	315
FAM189A1	213	169	88	89	95	86
FBXL2	25	25	15	61	93	58
LBR	248	247	222	531	1033	444
FGFR1OP	68	46	54	131	190	152
PITX1	400	405	396	289	159	263
PQLC1	1993	1880	2051	1436	771	1324
LYN	39	44	18	94	235	84
LRRC4B	336	390	257	217	94	189
SERPINI1	15	8	17	32	80	56
CCDC43	83	64	78	152	318	196
CNNM3	920	916	689	657	537	603
MRPS12	13148	11630	12719	8682	4568	8239
VTA1	237	198	156	392	725	444
PPP4R2	53	42	26	131	206	81
APBA2	1364	1237	1002	965	780	851
AP3B1	260	235	300	548	983	573
ZC3H12C	22	27	9	58	203	52
POMGNT1	4936	4670	5064	3664	2208	3314
PTDSS2	2362	2290	2563	1691	822	1559
PRRC2A	17327	18029	12275	11867	10454	10793
PPP2R3C	54	31	40	103	157	114
ZNF420	29	31	18	74	113	65
MAP3K10	2671	2451	2669	2028	1435	1852
SPART	114	112	61	211	440	235
WASHC5	241	207	238	492	952	446
TCEAL9	144	113	109	262	471	261
LNPK	52	60	33	124	238	112
TBC1D19	13	10	3	25	64	35
COASY	4842	4445	3435	3142	1834	2812
NCOA1	108	104	93	210	462	227
KLHL2	61	71	38	136	322	134
KIFC1	3446	3149	2346	2262	2340	2115
GPCPD1	49	33	22	95	153	88
WDR5	3139	2787	1883	1901	2026	1796
RAB3GAP1	378	308	407	731	1469	772
DPP7	8986	8209	11774	6642	3129	5709
LNCOC1	19	29	20	11	14	5
CDC5L	223	207	262	472	1015	497
ANKRD9	2044	2152	1951	1451	760	1391
MTRF1	8	8	15	27	70	42
GAS2L1	4411	4140	4423	3409	2184	2914
PHC3	67	99	67	177	505	179
KLHL25	368	280	342	233	113	201
ATP6V0B	6356	5797	8051	4648	2242	4107
SVIL	322	329	345	699	1600	642
HDAC2	680	644	656	1388	1920	1313
TDP2	212	153	185	382	662	396
TOPBP1	279	263	181	520	1137	476
AASDHPPT	139	123	76	269	419	250
ZBTB33	78	80	40	168	329	151
SRRT	4621	4465	2923	3051	2421	2687
ESRRA	2994	2794	2787	2356	1561	1913
RNA5SP283	154	183	166	125	108	102
CD81	3991	3768	4041	3029	2104	2792
UMAD1	35	27	13	72	133	67
CKAP2	263	206	173	488	890	400
MRFAP1L1	290	271	264	571	814	584
USP12	155	117	97	254	580	274
FOXP4	3092	3412	3821	2358	1283	2330
CDON	28	27	26	82	121	58
ADAM15	3354	3238	3381	2582	1872	2398
ZNHIT2	633	534	684	479	349	425
TYW3	59	65	33	129	220	135
RPUSD2	1012	978	951	775	458	659
ZBTB38	210	208	121	392	1399	382
VCPIP1	114	113	100	261	567	205
CCDC9	981	872	925	700	391	626
OSGEPL1	22	14	16	51	83	44
SLC9A6	104	91	98	232	691	189
SPATA2L	1668	1604	1732	1190	526	1042
BMT2	19	25	15	59	78	54
SIPA1	3742	3718	3659	2661	1295	2404
LRP5	2352	2582	1681	1758	1346	1456
PEX13	102	90	70	182	351	208
UQCC3	1180	1005	1242	806	347	696
YAF2	117	144	88	274	402	266
TGDS	32	34	22	69	143	80
FZR1	5314	4980	5155	3969	2315	3421
DDX49	4123	3952	3800	2904	1588	2679
CLPTM1L	4056	4175	2840	2835	2580	2576
RCC1L	3547	3351	3139	2720	2569	2390
HIC1	72	85	72	49	25	43
FAM3A	2859	2718	3357	2130	1225	2035
SMPD2	1094	962	1006	765	347	627
DDX52	89	107	75	193	456	205
ZNF585B	74	71	100	191	515	181
HMGA2	2125	1877	3157	5531	10010	5395
AC093673.1	742	713	529	456	394	512
NR0B1	234	200	151	126	85	132
MVD	2893	2723	2720	1971	850	1723
FAM9C	168	155	90	309	464	343
ARFGEF2	188	165	150	300	1139	405
ASPSCR1	2476	2402	2927	1899	963	1670
SLC25A22	1340	1287	903	931	901	806
AC112220.2	11	8	6	22	59	30
LIMA1	220	193	182	411	1137	393
PNRC2	282	254	175	508	858	489
RCN1	265	234	339	632	1290	559
SERPING1	17	37	32	148	84	97
PPWD1	73	53	41	121	225	151
CCDC124	8652	7919	8223	5894	2751	5196
PVR	3686	3376	2122	2001	2840	1868
CLPTM1	15380	15682	11663	10944	8257	9765
MED13	199	217	110	413	1075	362
TTC30A	18	17	18	42	78	59
HMGA1	168014	159362	197068	126384	79335	115783
PPP1R10	2307	2334	1621	1587	1725	1457
GPR155	6	12	15	48	44	38
SKIV2L	4292	4300	3683	3023	1576	2690
AC083805.1	8	3	3	25	21	20
FNBP1P1	4	6	1	18	34	12
DESI2	230	206	211	425	1044	446
FANCA	1843	1717	1410	1250	1055	1274
FBXL16	790	681	496	489	598	389
ZNF598	2469	2516	2023	1751	1992	1741
METTL4	66	61	43	114	272	153
EIF5AL1	544	618	478	390	261	395
SELENOI	155	135	121	291	838	276
ANK2	138	126	153	302	576	291
CEP95	90	70	76	180	320	168
TOGARAM1	38	21	9	74	118	71
DCAF15	3146	3096	2943	2452	1909	2231
GPR137	2961	2714	3393	2260	1474	2116
MCAM	25	24	16	66	68	70
VPS8	101	77	107	222	439	199
SEPT7P2	49	41	35	103	178	95
FKBP7	17	23	17	64	56	72
MCRIP2	2231	1849	2152	1477	680	1328
CCDC91	76	60	40	132	237	153
SLC38A2	1987	1751	1783	3667	11995	3698
TBXA2R	372	346	296	237	134	229
AEN	1500	1402	1026	784	1401	713
TMEM267	41	58	26	103	211	114
FNTA	158	117	181	378	480	342
RHOG	1491	1373	1811	1148	909	1149
RMDN1	281	266	313	652	903	563
SLU7	162	156	191	366	740	350
RNF145	907	747	821	1655	3534	1571
ZFYVE19	1483	1285	1546	1048	621	1016
TMEM115	2098	1756	1543	1394	1033	1320
PLPPR2	1636	1728	1668	1193	585	1120
CAST	833	710	829	1574	3653	1546
ZFP69B	24	21	17	58	102	49
GOPC	178	146	118	321	671	293
AC012645.1	14	19	25	8	7	9
SSX2IP	113	83	43	203	323	207
TSPAN4	4042	4058	4326	3284	2261	2873
MRPL14	3103	2929	3390	2285	1174	2073
FAM160B1	46	33	45	93	254	102
EEF1AKMT4	331	245	308	193	98	192
NTHL1	1766	1765	2163	1204	546	1248
CMTR2	81	50	31	147	324	122
MYSM1	50	46	21	91	338	103
DENND1A	1010	1026	689	722	619	622
UBR1	111	133	91	269	584	215
TENT5B	285	369	292	199	119	221
RWDD1	217	162	226	463	567	480
ASNSD1	87	109	44	197	351	214
FAM230C	2	3	8	13	40	25
TRAP1	6466	5904	5091	4123	1912	3699
ARMC5	924	786	545	601	535	480
RPS17	671	524	374	375	217	333
BRF1	3009	2675	1960	1920	1204	1738
PBK	117	114	49	256	395	217
STIL	170	212	148	364	839	376
UBE2V2	314	262	135	535	831	609
DCUN1D1	84	80	48	198	209	176
RNF14	287	260	279	548	936	570
EPC2	81	65	59	128	439	177
TLX3	119	82	80	50	62	63
MAPK11	1948	1705	2867	1422	577	1222
PLSCR4	9	10	7	20	117	30
SNAI1	29	21	16	12	3	9
GBP2	15	31	28	65	213	68
MOGS	3246	2769	2336	2255	1739	1966
TRIM52	42	40	25	99	186	76
TMEM177	497	437	311	325	277	270
GAS2L3	102	83	38	173	366	204
RASIP1	77	86	73	53	27	44
TAF1A-AS1	3	6	6	25	20	24
NFKBIL1	1987	1591	2181	1402	647	1181
FAM66C	28	36	37	110	99	96
ZSWIM4	993	1090	794	772	527	654
WRN	27	24	17	49	129	69
DUSP5P1	5	8	0	21	34	17
DCP2	68	83	83	167	461	178
CCND3	6797	6454	5676	4651	2643	4338
CORO1A	422	377	274	207	53	177
CPSF4	3712	3480	3843	2749	1423	2429
SLC6A15	72	80	53	156	433	146
SPRED1	180	175	147	335	775	345
RNPEPL1	3920	4314	6107	3417	2170	3091
MEN1	2611	2666	1859	1813	1245	1679
ZNF281	63	80	59	143	290	166
EIF5AP4	309	343	240	232	140	181
CENPX	4845	3865	4134	2707	1212	2847
SYTL2	72	68	44	135	282	146
IFT81	37	22	15	75	137	58
CDT1	10364	10224	11808	7914	4341	7155
PSMC6	210	155	78	379	531	376
LINC01606	66	55	37	134	168	139
AL121753.2	15	14	6	34	50	45
MAGI2-AS3	79	66	49	149	295	141
SIRT6	1676	1582	1605	1287	931	1201
TM2D1	72	52	77	188	283	132
KHSRP	11110	10179	10135	8141	7427	7757
BMPR1A	141	136	95	248	508	285
CASD1	29	46	19	84	207	81
GOLGA8B	46	59	29	118	166	119
ABRAXAS1	34	23	43	113	100	104
LRP4	179	181	78	100	61	63
PIGO	1884	1696	1231	1210	1113	1199
B4GALNT3	29	12	23	61	75	87
FBXO3	176	117	95	313	494	263
TCIRG1	2801	2646	2874	2057	1056	1858
MTHFD2	1130	946	1776	3033	5564	2922
IFIH1	51	60	45	95	1525	103
SLC35A5	47	42	52	112	255	104
GCN1	10199	11050	5752	6368	6057	5699
CAD	8154	8609	5491	5610	4334	5061
SOCS4	28	49	8	109	199	91
PLEKHJ1	3640	3152	4345	2701	1822	2629
SF1	8110	8241	7022	6104	4999	5700
SEC22B	414	379	343	774	1336	710
NCOA7	135	113	136	265	541	274
NNT-AS1	50	52	43	114	188	112
EXOSC4	1850	1505	2101	1183	511	1160
FAM43A	113	128	105	288	463	213
SMAD4	199	155	196	401	729	359
TGFBR1	86	92	72	193	393	167
NECTIN3	35	40	19	81	154	81
ZNF461	30	26	51	92	161	109
AC118549.1	82	53	31	140	309	133
MED25	2219	2031	2178	1691	1216	1582
TAF1B	75	68	53	151	231	150
GATA2	57	56	43	29	16	32
ACAP2	188	170	100	335	778	320
GVQW3	15	16	12	48	57	37
FAM84B	29	22	62	117	210	115
CHID1	2188	2032	2570	1681	911	1515
ITPKA	894	854	832	624	372	629
MRE11	83	64	52	180	317	123
CCNA1	91	58	93	171	583	189
RBM39	626	661	726	1417	2482	1263
SBNO2	4634	4536	3805	3386	3631	3125
HAUS1	134	111	74	252	326	258
FAM169A	11	7	10	25	57	31
CCDC92B	20	26	9	4	3	10
B4GALNT1	1366	1323	864	916	813	836
RGS17	113	94	98	276	276	221
AL162377.1	19	18	25	11	10	8
EFHD2	13506	11948	9103	8904	6628	7973
SRRD	289	269	261	192	196	207
HOMER2	394	358	295	244	300	252
FBLN1	1681	1690	1474	1165	495	1018
C11orf24	568	514	427	369	449	361
AL049840.1	16	16	40	86	136	69
QSOX1	3366	3468	2490	2425	2662	2135
WIZ	2588	2615	1986	1970	1852	1683
SLC12A9	1826	1620	1333	1227	956	1208
RNF182	58	60	128	226	518	210
SPIN3	89	88	87	206	427	170
CCP110	56	54	24	111	244	113
RABGGTB	201	160	108	337	513	371
CTBS	34	16	7	63	90	71
UBL7	3903	3337	3833	2520	1208	2495
FBXO30	89	97	59	165	430	198
CDAN1	1421	1250	919	942	824	864
PUSL1	1268	1102	1193	875	465	825
KPNA3	223	203	132	426	601	389
BCAT1	268	237	202	494	748	469
MAP3K7	316	273	221	581	924	510
SF3B6	339	363	401	847	915	868
TTC7B	1281	1333	1319	993	1292	896
ZBTB10	152	109	57	252	466	264
SNX16	22	32	15	62	174	57
ELAC2	3524	3481	2005	2240	2224	1959
AFAP1L2	16	8	6	32	110	26
CLTC	1803	1834	1868	3685	8651	3508
HCFC1	4951	5628	3407	3398	4020	2962
MSH3	84	79	63	165	285	168
NCDN	2009	1850	1630	1557	1374	1295
NCKAP5L	2322	2254	1970	1794	1254	1558
ZNF383	74	64	89	189	338	154
SLC29A2	668	526	405	391	211	344
CCDC25	127	79	125	247	505	240
EHHADH	29	49	24	100	143	86
JAG2	699	595	245	325	279	278
ERAL1	1699	1290	1083	1022	841	1018
KPNA4	487	490	419	889	2188	912
ARHGAP21	163	132	107	277	731	273
GLB1L3	11	10	6	21	55	37
APEH	8309	7931	9626	6218	2883	5416
RNF139	165	141	142	271	596	356
TSC22D4	2406	2231	1826	1764	1213	1513
NFE2L3	375	367	314	718	3199	673
EML3	3742	3634	3622	2571	1196	2449
GEMIN4	1459	1562	874	978	929	863
MAP7D3	95	88	80	201	416	170
GPRIN1	1951	1862	1283	1205	783	1240
MAN1B1	5372	4676	5666	4130	2496	3513
TMEM50B	162	136	115	308	572	261
DRAP1	19427	16989	16834	14117	9210	12105
ZC2HC1A	30	23	11	48	148	69
TAF6L	903	798	978	692	413	618
ARHGAP39	625	693	532	482	325	437
PDE4B	51	40	69	113	345	142
SPRTN	64	42	33	121	189	105
CPSF1	8925	9062	7362	6483	4055	5889
DDX56	6875	6578	5321	4797	3666	4631
ZNF160	19	24	13	64	141	37
ZNF605	15	16	3	46	70	33
SYT1	28	29	45	86	269	81
MEGF9	89	86	70	206	257	171
PGAP1	90	66	30	153	382	156
PLB1	8	4	2	22	32	14
NAPG	137	112	92	242	434	240
HACD2	147	141	128	265	729	299
DCTPP1	2576	2026	1764	1533	1030	1585
HMOX2	2203	2043	1394	1451	981	1305
AP000251.1	41	41	50	32	23	16
GTF2B	106	64	49	174	250	197
WAC-AS1	43	44	55	115	204	109
LAMP2	389	331	346	738	1667	643
CCDC6	309	322	318	643	1126	612
ZNF316	1507	1609	1258	1200	902	1051
PCM1	197	186	98	363	739	340
BBX	198	128	74	364	818	258
LRRC37A17P	39	33	43	92	152	95
FER	36	24	17	57	141	76
OTULINL	56	49	38	108	202	111
NPM3	4004	3555	4624	2754	1074	2448
RAD17	59	43	57	133	280	107
PXK	193	169	168	338	974	367
ABCB7	111	111	112	263	404	215
RDX	348	349	218	616	1002	676
C16orf87	26	11	23	64	68	69
SH2D3A	154	194	145	130	84	92
RAD51C	213	182	197	429	638	384
MTREX	173	187	94	377	646	303
TBC1D23	80	70	20	159	346	163
KCNH2	44	23	9	12	8	4
PRR14L	49	59	51	146	312	97
ICE1	153	172	108	327	691	279
METTL14	20	11	13	40	86	39
APBB1	1401	1314	1377	1077	640	964
PRKD2	1338	1469	1071	1062	875	927
CFAP36	197	156	232	456	707	389
MZT1	168	95	147	296	507	318
CCDC85C	3305	3464	1996	2188	1576	1980
NCK1	126	98	68	231	394	200
TEAD1	186	181	86	360	800	314
PBRM1	131	99	122	257	541	232
ZNF843	3	7	2	27	14	23
RHBDD2	3888	4177	4950	3340	2334	3061
IMP3	1119	851	742	661	376	632
GATAD2A	3375	3447	2547	2417	2847	2131
SEMA3A	19	22	12	45	109	47
ERCC2	9213	9408	8959	6473	2946	6018
NRGN	1155	1060	1057	800	436	782
FAM117A	86	54	31	169	195	152
AC022400.7	178	209	142	116	117	125
GTF2F2	120	77	92	215	347	210
IFRD1	217	156	168	374	912	347
PRDX3	655	569	533	1107	1885	1168
COMMD5	2536	2099	2323	1842	1136	1643
HIST1H2AG	58	83	104	229	282	199
CASKIN2	1664	1669	1159	1173	943	1105
TIPARP	164	102	91	238	907	261
EXTL2	92	77	73	177	276	179
TMEM14A	365	288	307	680	922	629
PHACTR1	12	12	4	34	56	25
TMEM102	701	544	425	401	239	385
GBX2	157	86	72	64	51	60
PER1	764	773	502	530	471	480
ASPHD1	1993	1742	1814	1533	940	1277
LENG8	1735	1628	1172	1221	1044	1094
BTBD1	297	238	179	467	837	515
IGHMBP2	820	769	551	530	518	546
SPPL2A	146	157	94	261	739	295
GNL1	7430	6707	6825	5388	3097	4847
TEAD3	780	769	516	535	353	474
CHST14	1833	1649	1591	1346	998	1293
WRAP53	2161	1948	1632	1394	685	1306
NOV	49	44	43	96	600	94
PLOD2	97	81	50	169	360	170
RTEL1-TNFRSF6B	68	55	43	37	29	31
PPP2R3B	617	590	484	437	301	414
RECQL	207	143	78	328	798	318
DHX15	649	532	520	1090	2020	1081
WDR34	14650	14185	16711	10968	5240	9823
EXOC1	62	72	44	149	313	118
KMT2B	8117	8440	5820	5556	6105	5343
ZNF638	124	96	90	208	479	220
RABEP1	152	134	111	283	438	275
RCHY1	40	19	17	68	102	77
ADAL	58	46	49	115	173	127
CAMSAP2	120	110	54	212	469	221
STARD3NL	252	198	268	509	844	478
RAB11FIP3	2059	1940	1322	1360	1234	1319
NDRG1	159	160	174	67	173	68
AP5Z1	2502	2410	2479	2043	1745	1843
C17orf53	487	440	401	370	377	289
DENND4A	62	43	37	123	252	93
ZNF284	16	19	27	59	86	57
DLGAP5	194	138	113	356	445	311
WDR81	2519	2473	1894	1862	1510	1700
CCNG2	85	90	130	229	497	227
PHF20L1	130	89	54	214	407	208
CTTNBP2NL	107	107	104	204	491	236
BCR	2291	2571	1581	1652	1403	1542
IL17RA	943	921	628	672	674	561
CEP120	45	41	28	92	267	80
RTCA	219	189	217	414	760	423
PES1	3134	3163	2189	2282	1997	2021
POLQ	56	64	50	144	258	110
RUSC1	2456	2075	2090	1781	1090	1564
GALNT1	173	172	78	334	587	320
ARHGEF6	57	33	104	189	398	176
AGPAT2	4777	4658	5911	3863	2232	3486
SCAF11	331	342	224	595	1338	592
ISLR	10	2	4	34	16	35
ZNF253	6	6	10	28	33	24
PROB1	921	871	801	650	431	662
RHBDF1	584	491	328	339	379	313
BRMS1	4456	3695	5109	3061	1417	2895
MCOLN1	676	659	641	524	566	494
VPS51	8032	7893	11317	6178	2465	5335
LEMD2	3316	3037	2378	2449	1988	2047
PFKP	7682	7414	4848	4986	4898	4737
SMO	2222	2115	1730	1551	618	1199
YES1	199	158	91	334	682	316
ZNF443	12	7	1	33	37	22
ZNF341	231	206	137	155	123	95
ZSCAN26	104	78	104	229	314	201
ARID3A	829	794	562	609	537	492
ANKRD16	273	305	176	179	143	168
NPAT	37	21	28	77	242	58
PICALM	499	372	348	786	1954	775
ME2	273	269	302	562	1096	551
ATP5PB	863	776	629	1634	1811	1660
YJU2	1347	1150	919	954	745	805
COMMD8	61	64	33	140	159	149
ITGAV	235	208	98	438	1030	361
DLX6-AS1	12	5	9	28	64	23
AP1AR	83	55	32	140	345	127
TPT1	4626	3502	4318	9261	10257	9717
DNPEP	2405	2161	2346	1830	1254	1721
NACC1	10091	10418	6991	7072	4545	6243
ZNF408	598	637	542	480	387	442
COMMD10	31	24	12	84	71	64
BEND4	64	52	19	148	202	109
GSK3A	9375	8851	8391	7222	5408	6442
VBP1	264	202	139	432	618	467
MTDH	469	454	295	810	1603	800
USP9X	415	318	266	632	1640	662
AATF	1435	1351	1072	993	1266	870
LNPEP	130	112	74	226	661	213
RNH1	5770	5331	5094	4247	3019	4031
AARD	20	15	26	53	82	61
SLC2A6	672	690	475	491	382	434
PPP1R14B	10142	9532	10080	7645	4178	6769
HECTD3	2014	2086	1621	1548	1287	1442
ARPP19	448	422	312	773	1695	747
NPDC1	2733	2381	2497	2104	1646	1898
POLG	1646	1467	1107	1081	870	1080
AFTPH	101	96	66	189	348	189
GPR158	8	13	6	31	72	22
NTSR1	5641	5808	6507	4677	4536	4453
ARL8B	180	151	102	280	634	324
ARFGAP1	4380	4099	3596	3320	2204	2847
NBPF6	6	7	6	28	54	13
FBXL3	42	43	16	72	255	101
MBTD1	67	75	45	132	241	159
GPAA1	8010	7252	8794	5802	2640	5193
BDH2	25	27	20	91	72	59
SCG2	18	25	43	77	148	88
EBNA1BP2	2630	2393	1501	1441	1972	1510
CPTP	2121	2154	2343	1795	1082	1536
FGD5-AS1	654	600	709	1312	2336	1232
TRIM33	120	94	61	208	548	184
CDC14A	39	30	29	86	262	62
SEMA3E	18	18	17	77	49	51
EXOC5	105	94	49	166	417	213
CCDC162P	26	27	32	66	109	80
C5orf24	263	208	167	448	805	405
BCKDHB	128	106	125	270	367	253
TMEM147	5795	5225	4621	4193	3679	3936
DLGAP1-AS2	149	124	163	312	538	297
TBX6	54	54	62	40	33	31
TAF2	168	147	86	272	701	293
DHRS13	254	242	226	177	81	151
GAS6	845	842	685	646	407	560
SEC61A2	193	181	159	113	134	135
CASC4	233	194	154	383	896	382
LYPLAL1	49	28	34	87	126	108
VAMP7	153	154	104	271	676	287
OXR1	75	59	34	121	246	147
FBXO28	142	161	85	280	655	272
UBR2	150	195	165	357	847	332
CLPP	4470	4329	4277	3420	1905	3036
LPCAT4	1344	1204	842	944	827	762
CHD6	110	70	131	219	654	239
AC244153.1	35	34	33	19	8	20
LINC01963	12	10	5	24	74	27
PLRG1	305	263	347	606	956	668
DDX11	3003	2673	1808	1913	1796	1824
2022-09-11	426	350	176	730	1513	646
[truncated: 11,843 more rows]

## Sheet: Supplementary Table3
Supplementary Table3
Raw data of central carbon metabolism(related to Fig3 A-D)								Raw data of seahorse(related to Fig3 E-F)
Metabolites	Control_1	Control_2	Control_3	ShOPA1_1	ShOPA1_2	ShOPA1_3		Well	Group	Time	OCR	ECAR	PER
Cysteic acid	1346.91	1020.82	894.042	924.95	810.671	763.734		A01	Background	1.85	0	0	0
Orotic acid	40.6406	8.63627	10.9924	13.0075	9.91265	13.9763		A02	1	1.85	300.003	60.5324	0
2-Picolinic acid	148.166	202.975	143.507	141.642	180.072	177.17		A03	1	1.85	215.562	39.4316	0
Methylmalonic acid								A04	1	1.85	206.73	42.4323	0
Mevalonic acid	19.4061	16.1755	13.7322	18.1432	19.8181	18.3994		A05	1	1.85	182.382	36.4756	0
Quinolinic acid	49.1792	57.3553	41.609	46.4192	46.362	51.3062		A06	1	1.85	154.904	35.539	0
Vanillylmandelic acid	2.10974	1.47769	1.06818	1.60286	1.80339	2.07599		A07	9	1.85	183.387	33.3201	0
4-Hydroxyphenylpyruvic acid	166.491	146.725	141.384	263.79	230.174	308.842		A08	9	1.85	168.454	37.4719	0
Glycolic acid	286.957	20.2403		151.452				A09	9	1.85	165.773	33.1151	0
2-Oxobutanoic acid		150.655	94.5056			143.153		A10	9	1.85	161.466	33.0977	0
cis-Aconitic acid	2022.72	1988	907.513	891.855	550.757	1094.8		A11	9	1.85	282.249	53.0136	0
alpha-Ketoisovaleric acid	166.832	155.412	86.4913	108.544	86.6657	110.805		A12	Background	1.85	0	0	0
Glyoxylic acid	1184.85	575.767	381.296	414.568	395.148	383.352		B01	Unassigned	1.85	-6.0113	0.0818482	0
3-Ureidopropionic acid	282.654	299.178	241.517	333.133	325.429	346.502		B02	2	1.85	177.621	39.0103	0
Homogentisic acid								B03	2	1.85	166.496	37.0373	0
2-Oxohexanedioic acid	5.02818	6.55347	5.38023	4.98738	4.87688	6.21586		B04	2	1.85	137.566	30.9586	0
2-Isopropylmalic acid	5.9069	4.37898	5.51596	4.469	3.51758	5.43388		B05	2	1.85	142.453	33.9964	0
Glyceric acid	287.761	827.496	248.104	404.826	359.417	391.601		B06	2	1.85	293.051	56.7029	0
Indole-3-acetic acid	2036.04	1898.14	907.412	890.796	680.087	1061.16		B07	10	1.85	166.79	48.1338	0
Hippuric acid	298.494	283.744	237.243	402.204	432.802	447.657		B08	10	1.85	229	55.6552	0
2-Aminobenzoic acid								B09	10	1.85	220	51.1321	0
D-Sedoheptulose 7-phosphate	6240.41	24504.5	7053.22	21699	23004.6	22835.2		B10	10	1.85	219.73	60.2623	0
D-Fructose 1,6-biphosphate	8907.95	2506.3	7605.36	12169.6	10092.3	11994.2		B11	10	1.85	253.95	57.5384	0
Galacturonic acid	1.6143	0.433024	1.90559	1.62293	1.41701	1.57122		B12	Unassigned	1.85	-5.37871	-0.408098	0
Glucaric acid	465.28	562.479	494.527	832.286	817.357	934.176		C01	Unassigned	1.85	-5.70156	-0.466351	0
Gluconic acid	2528.88	2752.88	2390.27	3144.44	3505.01	3210.85		C02	3	1.85	161.887	36.8388	0
Lactobionic acid	27.2975	15.6705	16.7114	18.9633	20.323	14.7667		C03	3	1.85	229.381	46.1114	0
D-Glucuronic acid	304.439	282.579	233.723	271.541	280.501	265.509		C04	3	1.85	198.993	38.134	0
Mannose 6-phosphate	1359.56	17989.1	1528.59	13656	7679.79	11552.8		C05	3	1.85	202.734	43.6348	0
Phosphoenolpyruvate	1030.62	14651.7	2311.22	12263.7	8748.57	12529.8		C06	3	1.85	192.32	47.3663	0
Adenosine triphosphate	55937.3	16079.8	27932.9	25060.8	33561.8	24264.6		C07	11	1.85	235.802	47.3152	0
Cyclic 3',5'-AMP	140.625	50.5733	97.0531	81.6484	98.918	86.8535		C08	11	1.85	247.558	49.2111	0
Guanosine diphosphate	21441.5	13462.3	13546.8	12810.2	17031.7	12700.6		C09	11	1.85	215.933	49.8461	0
Adenosine diphosphate	47797.6	11844	20122.6	12772.8	21776.5	12406		C10	11	1.85	234.465	50.6502	0
D-Ribulose 1,5-diphosphate								C11	11	1.85	279.582	65.6564	0
Glycerol 3-phosphate	789.281	5838.94	1332.89	9401.39	5625.69	8038.3		C12	Unassigned	1.85	-5.46582	-1.93761	0
Flavin adenosine dinucleotide	1564.47	1508.71	1195.58	2060.01	2197.46	1965.12		D01	Unassigned	1.85	-4.93247	-0.17423	0
Riboflavin 5'-phosphate	282.268	308.94	329.335	535.819	565.491	566.682		D02	4	1.85	232.005	47.8325	0
Guanosine triphosphate	30302.7	15411.9	18924.8	18995.8	20430.1	18790.8		D03	4	1.85	189.691	47.4414	0
2-Oxopentanedioic acid	2656.25	1104.52	1467.93	635.103	705.995	679.664		D04	4	1.85	200.213	53.072	0
6-Phosphogluconic acid	2547.62	6226.95	1848.84	5529.51	2960.36	5558.92		D05	4	1.85	223.874	57.2895	0
D-Fructose-6-p	1520.54	26872.2	1165.04	18371	10999.3	16829.5		D06	4	1.85	247.443	56.4493	0
Succinic acid	27940.2	21936.2	32617.6	19924.8	23617.4	17763.1		D07	12	1.85	203.666	55.1996	0
Fumaric acid	33446.6	33011.8	36827.2	33794.5	42547.6	30835.7		D08	12	1.85	203.499	45.9314	0
GLC-1-p	976.062	3448.31	1023.17	3200.74	2681.02	2985.38		D09	12	1.85	213.273	53.0778	0
GLC-6-p	2824.28	47650	2765.3	34929.4	15948.9	29591.3		D10	12	1.85	253.938	55.5626	0
Malic acid	55363.4	61410.5	53939.5	58607.7	59017	57166.8		D11	12	1.85	274.334	65.4323	0
Lactic acid	466824	475610	430166	670249	725149	674979		D12	Unassigned	1.85	-6.30708	-0.0779967	0
Maleic acid	51.0213	51.3203	51.4537	75.3331	55.5165	38.2422		E01	Unassigned	1.85	-5.29774	0.0494431	0
Pyruvic acid	210.174	157.244	161.696	261.332	249.715	329.54		E02	5	1.85	158.55	37.4639	0
D-Ribose 5-phosphate	58.7483	65.9007	52.9551	61.3931	74.1219	60.8679		E03	5	1.85	133.164	27.6769	0
Isocitric acid	3145.9	8640.99	3630.27	2725.21	765.817	3059.98		E04	5	1.85	136.851	36.4723	0
Citric acid	48940.8	39403.3	34962.4	25862.5	19791.6	32148.4		E05	5	1.85	119.171	27.2864	0
								E06	5	1.85	125.907	27.0495	0
								E07	13	1.85	122.531	27.8933	0
								E08	13	1.85	139.11	28.983	0
								E09	13	1.85	132.974	29.4853	0
								E10	13	1.85	116.449	26.9699	0
								E11	13	1.85	101.058	19.148	0
								E12	Unassigned	1.85	-2.17694	-0.102907	0
								F01	Unassigned	1.85	-5.02912	0.771382	0
								F02	6	1.85	119.438	23.7975	0
								F03	6	1.85	124.976	23.8492	0
								F04	6	1.85	144.84	27.9706	0
								F05	6	1.85	136.17	37.0936	0
								F06	6	1.85	205.29	50.4128	0
								F07	14	1.85	203.971	36.4837	0
								F08	14	1.85	200.498	51.2912	0
								F09	14	1.85	215.711	51.1272	0
								F10	14	1.85	219.768	53.346	0
								F11	14	1.85	199.162	48.156	0
								F12	Unassigned	1.85	-5.10634	-0.100052	0
								G01	Unassigned	1.85	-4.36118	0.710806	0
								G02	7	1.85	135.731	36.4527	0
								G03	7	1.85	146.588	37.9451	0
								G04	7	1.85	133.422	34.586	0
								G05	7	1.85	166.492	38.1079	0
								G06	7	1.85	154.571	39.9306	0
								G07	15	1.85	148.685	41.541	0
								G08	15	1.85	206.975	46.8863	0
								G09	15	1.85	250.262	59.8295	0
								G10	15	1.85	197.747	52.3498	0
								G11	15	1.85	200.625	57.2677	0
								G12	Unassigned	1.85	-5.29919	0.528458	0
								H01	Background	1.85	0	0	0
								H02	8	1.85	247.483	65.7575	0
								H03	8	1.85	216.527	46.9895	0
								H04	8	1.85	215.203	55.2093	0
								H05	8	1.85	211.068	51.5309	0
								H06	8	1.85	220.623	64.4253	0
								H07	16	1.85	221.778	60.3319	0
								H08	16	1.85	232.532	64.4626	0
								H09	16	1.85	217.251	46.6878	0
								H10	16	1.85	242.2	60.281	0
								H11	16	1.85	228.339	56.327	0
								H12	Background	1.85	0	0	0
								A01	Background	9.6	0	0	0
								A02	1	9.6	285.582	59.5181	0
								A03	1	9.6	202.932	37.0403	0
								A04	1	9.6	198.326	41.8397	0
								A05	1	9.6	173.823	34.9329	0
								A06	1	9.6	149.122	34.7713	0
								A07	9	9.6	176.645	32.1924	0
								A08	9	9.6	162.179	36.5363	0
								A09	9	9.6	158.603	33.063	0
								A10	9	9.6	154.647	31.9689	0
								A11	9	9.6	274.887	53.0373	0
								A12	Background	9.6	0	0	0
								B01	Unassigned	9.6	-10.7323	-0.0320902	0
								B02	2	9.6	168.284	37.2075	0
								B03	2	9.6	159.487	36.408	0
								B04	2	9.6	132.501	30.3143	0
								B05	2	9.6	137.92	32.7291	0
								B06	2	9.6	279.886	56.0929	0
								B07	10	9.6	164.468	47.4459	0
								B08	10	9.6	219.282	54.1102	0
								B09	10	9.6	212.065	50.0408	0
								B10	10	9.6	213.409	60.2914	0
								B11	10	9.6	242.25	56.3393	0
								B12	Unassigned	9.6	-4.88889	-0.260752	0
								C01	Unassigned	9.6	-5.76019	-0.620268	0
								C02	3	9.6	155.054	35.6071	0
								C03	3	9.6	218.665	44.0028	0
								C04	3	9.6	190.84	37.928	0
								C05	3	9.6	195.446	43.1243	0
								C06	3	9.6	183.853	46.5079	0
								C07	11	9.6	227.811	47.5392	0
								C08	11	9.6	238.091	48.576	0
								C09	11	9.6	208.963	49.1863	0
								C10	11	9.6	229.577	50.5626	0
								C11	11	9.6	272.825	65.4874	0
								C12	Unassigned	9.6	-5.2947	-1.52254	0
								D01	Unassigned	9.6	-5.6273	-0.418184	0
								D02	4	9.6	221.831	47.0435	0
								D03	4	9.6	181.378	45.7821	0
								D04	4	9.6	192.213	52.2192	0
								D05	4	9.6	213.604	55.6143	0
								D06	4	9.6	236.321	55.2292	0
								D07	12	9.6	198.129	54.7234	0
								D08	12	9.6	192.281	45.0555	0
								D09	12	9.6	206.66	52.0136	0
								D10	12	9.6	247.935	56.3916	0
								D11	12	9.6	265.481	64.4045	0
								D12	Unassigned	9.6	-5.83768	0.121908	0
								E01	Unassigned	9.6	-3.70431	-0.00555011	0
								E02	5	9.6	149.612	35.599	0
								E03	5	9.6	126.351	25.5048	0
								E04	5	9.6	130.196	34.3361	0
								E05	5	9.6	116.226	26.0742	0
								E06	5	9.6	121.532	25.7137	0
								E07	13	9.6	120.145	28.0363	0
								E08	13	9.6	133.024	27.8364	0
								E09	13	9.6	127.265	27.6422	0
								E10	13	9.6	109.36	26.0647	0
								E11	13	9.6	97.0922	17.7609	0
								E12	Unassigned	9.6	-3.74431	-0.254374	0
								F01	Unassigned	9.6	-5.43819	0.577783	0
								F02	6	9.6	113.023	22.3842	0
								F03	6	9.6	119.342	22.3903	0
								F04	6	9.6	139.777	27.2033	0
								F05	6	9.6	133.219	35.3065	0
								F06	6	9.6	196.726	48.2766	0
								F07	14	9.6	195.126	35.7159	0
								F08	14	9.6	195.562	49.7213	0
								F09	14	9.6	207.149	48.6241	0
								F10	14	9.6	213.289	51.8667	0
								F11	14	9.6	189.56	45.6691	0
								F12	Unassigned	9.6	-5.6606	-0.0154146	0
								G01	Unassigned	9.6	-4.71061	0.545828	0
								G02	7	9.6	128.872	34.8612	0
								G03	7	9.6	140.725	36.9083	0
								G04	7	9.6	127.847	32.3372	0
								G05	7	9.6	160.479	37.0611	0
								G06	7	9.6	148.947	38.783	0
								G07	15	9.6	143.447	40.3801	0
								G08	15	9.6	200.043	46.481	0
								G09	15	9.6	239.078	57.2826	0
								G10	15	9.6	191.602	51.1876	0
								G11	15	9.6	195.273	56.1917	0
								G12	Unassigned	9.6	-5.18367	0.627006	0
								H01	Background	9.6	0	0	0
								H02	8	9.6	235.066	64.8739	0
								H03	8	9.6	206.001	45.307	0
								H04	8	9.6	207.082	54.7703	0
								H05	8	9.6	199.925	50.0451	0
								H06	8	9.6	212.309	62.9214	0
								H07	16	9.6	212.84	58.821	0
								H08	16	9.6	222.556	64.3791	0
								H09	16	9.6	203.172	44.8531	0
								H10	16	9.6	232.484	59.5595	0
								H11	16	9.6	215.945	54.9677	0
								H12	Background	9.6	0	0	0
								A01	Background	17.3333	0	0	0
								A02	1	17.3333	278.338	58.2997	0
								A03	1	17.3333	199.059	37.0689	0
								A04	1	17.3333	194.835	41.626	0
								A05	1	17.3333	171.894	34.5416	0
								A06	1	17.3333	145.451	34.2383	0
								A07	9	17.3333	173.456	31.7641	0
								A08	9	17.3333	158.983	36.5884	0
								A09	9	17.3333	155.004	32.1709	0
								A10	9	17.3333	151.928	31.522	0
								A11	9	17.3333	271.424	52.7525	0
								A12	Background	17.3333	0	0	0
								B01	Unassigned	17.3333	-8.63375	-0.194516	0
								B02	2	17.3333	164.539	36.9911	0
								B03	2	17.3333	156.244	35.903	0
								B04	2	17.3333	130.111	29.963	0
								B05	2	17.3333	136.166	32.4691	0
								B06	2	17.3333	275.083	55.8725	0
								B07	10	17.3333	162.227	47.1335	0
								B08	10	17.3333	215.154	53.981	0
								B09	10	17.3333	208.516	49.6156	0
								B10	10	17.3333	211.119	60.115	0
								B11	10	17.3333	236.429	56.1353	0
								B12	Unassigned	17.3333	-5.08897	-0.286607	0
								C01	Unassigned	17.3333	-5.18213	-0.598551	0
								C02	3	17.3333	153.515	35.7168	0
								C03	3	17.3333	214.886	43.8087	0
								C04	3	17.3333	187.551	37.7746	0
								C05	3	17.3333	193.37	42.7361	0
								C06	3	17.3333	180.634	46.3626	0
								C07	11	17.3333	224.772	47.472	0
								C08	11	17.3333	235.183	48.6278	0
								C09	11	17.3333	206.549	49.2276	0
								C10	11	17.3333	227.253	50.2346	0
								C11	11	17.3333	271.395	65.7758	0
								C12	Unassigned	17.3333	-5.0074	-1.43867	0
								D01	Unassigned	17.3333	-4.95942	-0.250297	0
								D02	4	17.3333	219.523	47.0813	0
								D03	4	17.3333	178.697	46.1178	0
								D04	4	17.3333	188.508	52.2464	0
								D05	4	17.3333	210.652	55.7276	0
								D06	4	17.3333	232.202	56.7481	0
								D07	12	17.3333	195.226	54.421	0
								D08	12	17.3333	189.311	44.9771	0
								D09	12	17.3333	204.258	51.8609	0
								D10	12	17.3333	245.355	55.8922	0
								D11	12	17.3333	262.393	64.0251	0
								D12	Unassigned	17.3333	-5.68178	-0.0279142	0
								E01	Unassigned	17.3333	-3.09919	-0.0793042	0
								E02	5	17.3333	144.7	34.4931	0
								E03	5	17.3333	123.059	24.8866	0
								E04	5	17.3333	127.011	33.3158	0
								E05	5	17.3333	116.633	25.5071	0
								E06	5	17.3333	118.404	24.9368	0
								E07	13	17.3333	117.667	25.3611	0
								E08	13	17.3333	129.703	27.5259	0
								E09	13	17.3333	124.019	26.5333	0
								E10	13	17.3333	106.8	25.1185	0
								E11	13	17.3333	94.4201	17.304	0
								E12	Unassigned	17.3333	-3.24653	-0.485362	0
								F01	Unassigned	17.3333	-4.32317	0.38199	0
								F02	6	17.3333	109.531	21.6305	0
								F03	6	17.3333	117.378	21.5793	0
								F04	6	17.3333	136.728	25.3198	0
								F05	6	17.3333	130.917	34.7045	0
								F06	6	17.3333	192.676	47.5912	0
								F07	14	17.3333	192.067	35.4512	0
								F08	14	17.3333	193.114	49.3038	0
								F09	14	17.3333	204.953	47.8408	0
								F10	14	17.3333	209.744	50.7308	0
								F11	14	17.3333	183.033	45.1728	0
								F12	Unassigned	17.3333	-5.17164	0.0634574	0
								G01	Unassigned	17.3333	-4.56205	0.499376	0
								G02	7	17.3333	124.752	33.959	0
								G03	7	17.3333	137.531	36.4378	0
								G04	7	17.3333	125.394	32.0651	0
								G05	7	17.3333	155.978	35.6391	0
								G06	7	17.3333	145.415	37.9788	0
								G07	15	17.3333	140.841	39.8248	0
								G08	15	17.3333	196.424	45.3691	0
								G09	15	17.3333	234.305	56.373	0
								G10	15	17.3333	188.308	50.5598	0
								G11	15	17.3333	190.255	55.1999	0
								G12	Unassigned	17.3333	-5.45461	0.430001	0
								H01	Background	17.3333	0	0	0
								H02	8	17.3333	229.787	63.7282	0
								H03	8	17.3333	201.043	44.4084	0
								H04	8	17.3333	203.502	54.3093	0
								H05	8	17.3333	194.54	48.9605	0
								H06	8	17.3333	208.94	61.6483	0
								H07	16	17.3333	207.865	58.8216	0
								H08	16	17.3333	218.966	63.9112	0
								H09	16	17.3333	200.544	44.9721	0
								H10	16	17.3333	228.921	58.9209	0
								H11	16	17.3333	212.112	54.8224	0
								H12	Background	17.3333	0	0	0
								A01	Background	25.2833	0	0	0
								A02	1	25.2833	214.59	79.4004	0
								A03	1	25.2833	161.531	53.8966	0
								A04	1	25.2833	156.524	55.8357	0
								A05	1	25.2833	145.698	46.8656	0
								A06	1	25.2833	124.571	43.5677	0
								A07	9	25.2833	148.32	43.0048	0
								A08	9	25.2833	133.598	46.6072	0
								A09	9	25.2833	128.283	41.6175	0
								A10	9	25.2833	128.353	41.6885	0
								A11	9	25.2833	209.318	75.007	0
								A12	Background	25.2833	0	0	0
								B01	Unassigned	25.2833	-8.5798	-0.347345	0
								B02	2	25.2833	138.295	47.9322	0
								B03	2	25.2833	134.837	43.7625	0
								B04	2	25.2833	118.953	35.1908	0
								B05	2	25.2833	121.51	39.6639	0
								B06	2	25.2833	215.342	77.2507	0
								B07	10	25.2833	132.807	65.8655	0
								B08	10	25.2833	170.3	78.3798	0
								B09	10	25.2833	161.863	67.0631	0
								B10	10	25.2833	169.052	85.555	0
								B11	10	25.2833	182.908	79.5458	0
								B12	Unassigned	25.2833	-4.67149	-0.23937	0
								C01	Unassigned	25.2833	-4.4033	-0.80348	0
								C02	3	25.2833	131.164	45.712	0
								C03	3	25.2833	176.611	57.7852	0
								C04	3	25.2833	160.781	47.7354	0
								C05	3	25.2833	162.463	54.2136	0
								C06	3	25.2833	152.032	57.9547	0
								C07	11	25.2833	187.656	61.4116	0
								C08	11	25.2833	193.991	62.9624	0
								C09	11	25.2833	171.045	65.4748	0
								C10	11	25.2833	186.062	67.0012	0
								C11	11	25.2833	215.934	87.7699	0
								C12	Unassigned	25.2833	-4.74256	-1.19624	0
								D01	Unassigned	25.2833	-5.45005	-0.618419	0
								D02	4	25.2833	175.921	64.6111	0
								D03	4	25.2833	145.846	59.5377	0
								D04	4	25.2833	154.995	69.457	0
								D05	4	25.2833	168.888	73.8462	0
								D06	4	25.2833	188.692	71.9634	0
								D07	12	25.2833	160.972	72.1427	0
								D08	12	25.2833	155.413	58.536	0
								D09	12	25.2833	168.686	68.2463	0
								D10	12	25.2833	198.376	76.7272	0
								D11	12	25.2833	204.537	86.1738	0
								D12	Unassigned	25.2833	-4.94749	-0.0572628	0
								E01	Unassigned	25.2833	-3.43387	-0.264047	0
								E02	5	25.2833	136.322	36.12	0
								E03	5	25.2833	116.388	24.5548	0
								E04	5	25.2833	120.095	34.3819	0
								E05	5	25.2833	110.628	24.8796	0
								E06	5	25.2833	112.372	24.6686	0
								E07	13	25.2833	114.606	26.9498	0
								E08	13	25.2833	122.819	27.4719	0
								E09	13	25.2833	119.505	27.1845	0
								E10	13	25.2833	103.298	24.9729	0
								E11	13	25.2833	90.2511	17.7411	0
								E12	Unassigned	25.2833	-2.88759	-0.67608	0
								F01	Unassigned	25.2833	-6.03307	0.310156	0
								F02	6	25.2833	103.638	21.896	0
								F03	6	25.2833	103.215	21.045	0
								F04	6	25.2833	130.572	25.9928	0
								F05	6	25.2833	125.174	35.9513	0
								F06	6	25.2833	181.21	50.1636	0
								F07	14	25.2833	183.859	38.2184	0
								F08	14	25.2833	182.842	50.2723	0
								F09	14	25.2833	191.536	50.5355	0
								F10	14	25.2833	194.048	55.4114	0
								F11	14	25.2833	173.902	49.6375	0
								F12	Unassigned	25.2833	-3.07711	-0.274996	0
								G01	Unassigned	25.2833	-3.91477	0.483708	0
								G02	7	25.2833	111.729	40.1088	0
								G03	7	25.2833	120.522	42.7573	0
								G04	7	25.2833	115.153	36.8432	0
								G05	7	25.2833	135.984	42.4935	0
								G06	7	25.2833	129.469	45.2842	0
								G07	15	25.2833	127.085	48.8488	0
								G08	15	25.2833	164.996	52.7194	0
								G09	15	25.2833	194.602	67.6501	0
								G10	15	25.2833	161.035	61.8692	0
								G11	15	25.2833	160.405	68.4321	0
								G12	Unassigned	25.2833	-4.42831	0.495412	0
								H01	Background	25.2833	0	0	0
								H02	8	25.2833	192.954	77.5766	0
								H03	8	25.2833	170.028	57.788	0
								H04	8	25.2833	170.007	65.9933	0
								H05	8	25.2833	167.384	60.1504	0
								H06	8	25.2833	177.901	74.9207	0
								H07	16	25.2833	186.062	77.2311	0
								H08	16	25.2833	187.496	76.3507	0
								H09	16	25.2833	177.663	55.4879	0
								H10	16	25.2833	196.402	73.7114	0
								H11	16	25.2833	184.494	70.7417	0
								H12	Background	25.2833	0	0	0
								A01	Background	33.0167	0	0	0
								A02	1	33.0167	211.309	82.6207	0
								A03	1	33.0167	158.122	52.5043	0
								A04	1	33.0167	156.794	57.5928	0
								A05	1	33.0167	142.651	45.4991	0
								A06	1	33.0167	123.282	44.2942	0
								A07	9	33.0167	145.325	41.9769	0
								A08	9	33.0167	131.995	47.0491	0
								A09	9	33.0167	128.228	41.9855	0
								A10	9	33.0167	126.788	42.1644	0
								A11	9	33.0167	201.068	73.1123	0
								A12	Background	33.0167	0	0	0
								B01	Unassigned	33.0167	-8.36836	-0.156107	0
								B02	2	33.0167	137.521	49.7661	0
								B03	2	33.0167	134.653	44.172	0
								B04	2	33.0167	116.926	35.2962	0
								B05	2	33.0167	119.924	39.9231	0
								B06	2	33.0167	212.063	77.6485	0
								B07	10	33.0167	129.544	65.3049	0
								B08	10	33.0167	167.557	78.9152	0
								B09	10	33.0167	160.815	68.0859	0
								B10	10	33.0167	167.586	85.4098	0
								B11	10	33.0167	178.679	80.9017	0
								B12	Unassigned	33.0167	-4.84385	-0.336958	0
								C01	Unassigned	33.0167	-4.76538	-0.590122	0
								C02	3	33.0167	131.534	45.4697	0
								C03	3	33.0167	176.719	60.6221	0
								C04	3	33.0167	160.046	47.4336	0
								C05	3	33.0167	161.197	54.5473	0
								C06	3	33.0167	151.869	58.6578	0
								C07	11	33.0167	186.14	61.5861	0
								C08	11	33.0167	194.713	64.2566	0
								C09	11	33.0167	170.06	66.3302	0
								C10	11	33.0167	184.511	68.4462	0
								C11	11	33.0167	213.683	87.1247	0
								C12	Unassigned	33.0167	-5.16413	-1.20552	0
								D01	Unassigned	33.0167	-5.01998	-0.0382862	0
								D02	4	33.0167	174.086	64.9508	0
								D03	4	33.0167	145.601	61.9389	0
								D04	4	33.0167	153.04	69.8793	0
								D05	4	33.0167	167.263	74.8081	0
								D06	4	33.0167	187.253	72.2937	0
								D07	12	33.0167	160.04	72.4784	0
								D08	12	33.0167	156.173	59.7993	0
								D09	12	33.0167	168.558	68.4066	0
								D10	12	33.0167	198.323	76.9804	0
								D11	12	33.0167	204.509	87.0248	0
								D12	Unassigned	33.0167	-4.33021	0.0647651	0
								E01	Unassigned	33.0167	-2.49027	-0.118541	0
								E02	5	33.0167	134.255	36.2343	0
								E03	5	33.0167	115.637	26.0498	0
								E04	5	33.0167	118.516	34.7167	0
								E05	5	33.0167	108.588	24.9121	0
								E06	5	33.0167	111.766	24.4757	0
								E07	13	33.0167	114.259	26.6382	0
								E08	13	33.0167	122.453	28.1475	0
								E09	13	33.0167	118.386	26.8484	0
								E10	13	33.0167	105.728	25.0005	0
								E11	13	33.0167	89.2842	17.3847	0
								E12	Unassigned	33.0167	-2.59946	-0.648638	0
								F01	Unassigned	33.0167	-4.42532	0.258535	0
								F02	6	33.0167	101.267	21.0367	0
								F03	6	33.0167	102.224	22.6714	0
								F04	6	33.0167	129.047	25.9601	0
								F05	6	33.0167	124.394	36.1412	0
								F06	6	33.0167	179.791	49.4063	0
								F07	14	33.0167	184.417	39.0803	0
								F08	14	33.0167	183.206	50.7196	0
								F09	14	33.0167	191.303	50.2535	0
								F10	14	33.0167	195.232	55.9411	0
								F11	14	33.0167	170.83	48.4277	0
								F12	Unassigned	33.0167	-3.30849	0.101638	0
								G01	Unassigned	33.0167	-3.50429	0.512979	0
								G02	7	33.0167	111.31	40.569	0
								G03	7	33.0167	120.429	44.7496	0
								G04	7	33.0167	114.685	37.2693	0
								G05	7	33.0167	136.15	42.4266	0
								G06	7	33.0167	127.882	45.2838	0
								G07	15	33.0167	125.173	48.735	0
								G08	15	33.0167	166.735	54.9516	0
								G09	15	33.0167	196.451	69.5255	0
								G10	15	33.0167	160.332	63.3455	0
								G11	15	33.0167	160.459	67.787	0
								G12	Unassigned	33.0167	-4.36487	0.383576	0
								H01	Background	33.0167	0	0	0
								H02	8	33.0167	192.906	78.8942	0
								H03	8	33.0167	168.152	55.5554	0
								H04	8	33.0167	170.306	68.9041	0
								H05	8	33.0167	163.771	58.7769	0
								H06	8	33.0167	178.362	75.5111	0
								H07	16	33.0167	181.783	75.4521	0
								H08	16	33.0167	188.373	78.8459	0
								H09	16	33.0167	173.861	53.8033	0
								H10	16	33.0167	197.417	74.2485	0
								H11	16	33.0167	179.888	68.2948	0
								H12	Background	33.0167	0	0	0
								A01	Background	40.75	0	0	0
								A02	1	40.75	206.683	79.9929	0
								A03	1	40.75	156.1	50.5899	0
								A04	1	40.75	154.842	56.7103	0
								A05	1	40.75	140.327	44.7079	0
								A06	1	40.75	121.204	43.1878	0
								A07	9	40.75	143.288	40.9146	0
								A08	9	40.75	130.291	46.349	0
								A09	9	40.75	126.922	40.1345	0
								A10	9	40.75	125.552	41.2722	0
								A11	9	40.75	196.369	71.9899	0
								A12	Background	40.75	0	0	0
								B01	Unassigned	40.75	-7.5104	0.0661351	0
								B02	2	40.75	136.328	48.0744	0
								B03	2	40.75	132.754	42.7574	0
								B04	2	40.75	115.02	34.3218	0
								B05	2	40.75	118.594	38.3035	0
								B06	2	40.75	207.335	76.0874	0
								B07	10	40.75	126.065	64.6293	0
								B08	10	40.75	163.071	77.3939	0
								B09	10	40.75	157.543	66.0629	0
								B10	10	40.75	163	84.0936	0
								B11	10	40.75	175.198	79.381	0
								B12	Unassigned	40.75	-3.10465	-0.244138	0
								C01	Unassigned	40.75	-3.48813	-0.541739	0
								C02	3	40.75	131.022	44.9158	0
								C03	3	40.75	174.559	57.9497	0
								C04	3	40.75	159.302	46.8542	0
								C05	3	40.75	158.649	53.669	0
								C06	3	40.75	150.393	57.6686	0
								C07	11	40.75	184.679	60.64	0
								C08	11	40.75	192.913	62.4012	0
								C09	11	40.75	167.721	64.9237	0
								C10	11	40.75	182.327	66.7573	0
								C11	11	40.75	214.368	87.4794	0
								C12	Unassigned	40.75	-3.88801	-1.30926	0
								D01	Unassigned	40.75	-4.29109	-0.188731	0
								D02	4	40.75	172.672	62.7703	0
								D03	4	40.75	144.481	60.337	0
								D04	4	40.75	151.51	68.7404	0
								D05	4	40.75	164.36	72.6661	0
								D06	4	40.75	183.539	69.2544	0
								D07	12	40.75	157.909	71.3217	0
								D08	12	40.75	155.192	58.6168	0
								D09	12	40.75	166.807	66.8595	0
								D10	12	40.75	196.799	76.3613	0
								D11	12	40.75	204.865	85.4879	0
								D12	Unassigned	40.75	-4.19686	-0.0751513	0
								E01	Unassigned	40.75	-2.36503	-0.142573	0
								E02	5	40.75	130.275	34.2275	0
								E03	5	40.75	112.778	23.8109	0
								E04	5	40.75	115.142	32.1431	0
								E05	5	40.75	105.261	23.7248	0
								E06	5	40.75	108.624	23.2446	0
								E07	13	40.75	111.381	25.4507	0
								E08	13	40.75	118.952	26.6625	0
								E09	13	40.75	115.482	25.3191	0
								E10	13	40.75	102.918	24.8269	0
								E11	13	40.75	86.9215	16.2014	0
								E12	Unassigned	40.75	-1.53701	-0.587089	0
								F01	Unassigned	40.75	-3.71795	0.496085	0
								F02	6	40.75	98.843	20.0426	0
								F03	6	40.75	99.9598	21.3916	0
								F04	6	40.75	125.512	24.2382	0
								F05	6	40.75	121.274	34.0795	0
								F06	6	40.75	175.317	47.0812	0
								F07	14	40.75	180.123	38.2394	0
								F08	14	40.75	179.565	49.492	0
								F09	14	40.75	187.68	47.8273	0
								F10	14	40.75	193.207	54.7958	0
								F11	14	40.75	167.814	46.5926	0
								F12	Unassigned	40.75	-2.36963	0.0341688	0
								G01	Unassigned	40.75	-3.41298	0.302722	0
								G02	7	40.75	109.129	38.8864	0
								G03	7	40.75	118.296	42.7423	0
								G04	7	40.75	113.323	35.5779	0
								G05	7	40.75	133.138	40.817	0
								G06	7	40.75	124.8	43.3974	0
								G07	15	40.75	122.941	47.6689	0
								G08	15	40.75	164.262	53.7825	0
								G09	15	40.75	193.571	67.3088	0
								G10	15	40.75	156.865	61.0682	0
								G11	15	40.75	158.187	66.2326	0
								G12	Unassigned	40.75	-3.64504	0.33498	0
								H01	Background	40.75	0	0	0
								H02	8	40.75	192.279	79.1279	0
								H03	8	40.75	166.097	53.8166	0
								H04	8	40.75	169.967	67.9959	0
								H05	8	40.75	161.631	57.2912	0
								H06	8	40.75	176.657	74.8237	0
								H07	16	40.75	178.051	73.7265	0
								H08	16	40.75	185.987	77.5454	0
								H09	16	40.75	171.363	52.857	0
								H10	16	40.75	195.455	72.8124	0
								H11	16	40.75	178.559	67.2075	0
								H12	Background	40.75	0	0	0
								A01	Background	48.7	0	0	0
								A02	1	48.7	282.959	80.1857	0
								A03	1	48.7	198.674	50.4503	0
								A04	1	48.7	204.91	55.1619	0
								A05	1	48.7	156.363	43.8418	0
								A06	1	48.7	132.462	42.9273	0
								A07	9	48.7	173.173	40.342	0
								A08	9	48.7	147.512	45.1053	0
								A09	9	48.7	140.106	38.7163	0
								A10	9	48.7	136.87	39.8647	0
								A11	9	48.7	259.828	69.9251	0
								A12	Background	48.7	0	0	0
								B01	Unassigned	48.7	-7.11342	-0.0512364	0
								B02	2	48.7	135.435	47.2582	0
								B03	2	48.7	140.681	41.8817	0
								B04	2	48.7	114.887	31.7377	0
								B05	2	48.7	127.609	37.8471	0
								B06	2	48.7	289.598	74.6032	0
								B07	10	48.7	169.765	63.477	0
								B08	10	48.7	231.983	73.7538	0
								B09	10	48.7	213.118	64.1812	0
								B10	10	48.7	224.73	81.6829	0
								B11	10	48.7	261.134	78.5522	0
								B12	Unassigned	48.7	-3.66305	-0.324429	0
								C01	Unassigned	48.7	-3.44997	-0.647509	0
								C02	3	48.7	138.826	44.4016	0
								C03	3	48.7	215.554	56.2647	0
								C04	3	48.7	181.993	45.9136	0
								C05	3	48.7	195.366	53.6402	0
								C06	3	48.7	172.835	56.7882	0
								C07	11	48.7	228.405	59.4369	0
								C08	11	48.7	234.258	60.4351	0
								C09	11	48.7	208.417	63.4128	0
								C10	11	48.7	255.86	66.5633	0
								C11	11	48.7	284.174	84.6293	0
								C12	Unassigned	48.7	-4.34486	-1.1483	0
								D01	Unassigned	48.7	-3.81335	-0.339708	0
								D02	4	48.7	214.002	61.853	0
								D03	4	48.7	169.162	58.0754	0
								D04	4	48.7	192.442	66.3537	0
								D05	4	48.7	208.301	72.1262	0
								D06	4	48.7	217.099	68.5645	0
								D07	12	48.7	192.332	69.9493	0
								D08	12	48.7	188.306	55.4137	0
								D09	12	48.7	196.785	66.0554	0
								D10	12	48.7	261.125	73.4557	0
								D11	12	48.7	270.476	83.7193	0
								D12	Unassigned	48.7	-3.92585	-0.107436	0
								E01	Unassigned	48.7	-1.77463	0.101097	0
								E02	5	48.7	134.941	33.2883	0
								E03	5	48.7	113.693	23.607	0
								E04	5	48.7	113.648	31.0983	0
								E05	5	48.7	104.85	23.2203	0
								E06	5	48.7	107.666	22.9684	0
								E07	13	48.7	102.272	22.4572	0
								E08	13	48.7	109.433	22.5886	0
								E09	13	48.7	108.084	22.8623	0
								E10	13	48.7	96.5277	22.6181	0
								E11	13	48.7	84.5176	15.1967	0
								E12	Unassigned	48.7	-2.30928	-0.60457	0
								F01	Unassigned	48.7	-3.54703	0.389621	0
								F02	6	48.7	98.3884	19.7164	0
								F03	6	48.7	98.1943	19.0757	0
								F04	6	48.7	127.602	24.3226	0
								F05	6	48.7	122.722	33.2691	0
								F06	6	48.7	185.173	47.7896	0
								F07	14	48.7	192.808	37.4014	0
								F08	14	48.7	185.724	48.3705	0
								F09	14	48.7	199.66	47.3608	0
								F10	14	48.7	205.449	52.8811	0
								F11	14	48.7	176.49	46.405	0
								F12	Unassigned	48.7	-2.98973	-0.127821	0
								G01	Unassigned	48.7	-2.85131	0.496331	0
								G02	7	48.7	112.38	38.2914	0
								G03	7	48.7	122.424	39.7987	0
								G04	7	48.7	114.512	35.6015	0
								G05	7	48.7	140.589	39.5606	0
								G06	7	48.7	133.35	42.1472	0
								G07	15	48.7	126.169	46.0282	0
								G08	15	48.7	184.906	48.2248	0
								G09	15	48.7	210.938	64.3504	0
								G10	15	48.7	172.586	56.9008	0
								G11	15	48.7	167.745	63.1865	0
								G12	Unassigned	48.7	-3.01536	0.385877	0
								H01	Background	48.7	0	0	0
								H02	8	48.7	213.189	76.4549	0
								H03	8	48.7	183.16	51.8266	0
								H04	8	48.7	190.323	65.2295	0
								H05	8	48.7	171.889	54.6371	0
								H06	8	48.7	189.098	72.4435	0
								H07	16	48.7	188.556	68.4557	0
								H08	16	48.7	202.767	72.5775	0
								H09	16	48.7	173.002	48.4295	0
								H10	16	48.7	222.19	69.8315	0
								H11	16	48.7	181.794	65.8047	0
								H12	Background	48.7	0	0	0
								A01	Background	56.4333	0	0	0
								A02	1	56.4333	290.406	79.0874	0
								A03	1	56.4333	192.763	49.2467	0
								A04	1	56.4333	200.67	55.1048	0
								A05	1	56.4333	154.256	42.9798	0
								A06	1	56.4333	133.019	42.0009	0
								A07	9	56.4333	162.364	39.2874	0
								A08	9	56.4333	147.826	44.5562	0
								A09	9	56.4333	134.273	38.5633	0
								A10	9	56.4333	136.486	39.8689	0
								A11	9	56.4333	265.042	69.351	0
								A12	Background	56.4333	0	0	0
								B01	Unassigned	56.4333	-6.57193	-0.178685	0
								B02	2	56.4333	133.265	46.5448	0
								B03	2	56.4333	140.482	41.4476	0
								B04	2	56.4333	114.005	31.8615	0
								B05	2	56.4333	127.934	37.2143	0
								B06	2	56.4333	315.635	74.365	0
								B07	10	56.4333	176.27	62.7766	0
								B08	10	56.4333	234.249	73.8563	0
								B09	10	56.4333	228.718	65.0173	0
								B10	10	56.4333	231.569	81.2269	0
								B11	10	56.4333	273.614	77.6561	0
								B12	Unassigned	56.4333	-2.93206	-0.0247277	0
								C01	Unassigned	56.4333	-3.17528	-0.561358	0
								C02	3	56.4333	139.966	43.625	0
								C03	3	56.4333	228.923	56.3818	0
								C04	3	56.4333	183.658	45.6735	0
								C05	3	56.4333	199.743	53.0537	0
								C06	3	56.4333	171.139	56.0616	0
								C07	11	56.4333	226.777	58.7469	0
								C08	11	56.4333	236.421	60.3785	0
								C09	11	56.4333	218.294	62.858	0
								C10	11	56.4333	251.333	66.6071	0
								C11	11	56.4333	282.317	84.2029	0
								C12	Unassigned	56.4333	-3.21431	-1.07762	0
								D01	Unassigned	56.4333	-3.0586	-0.309445	0
								D02	4	56.4333	227.909	61.5521	0
								D03	4	56.4333	170.181	58.3952	0
								D04	4	56.4333	187.948	66.696	0
								D05	4	56.4333	211.583	71.6192	0
								D06	4	56.4333	226.725	68.3177	0
								D07	12	56.4333	192.018	69.1705	0
								D08	12	56.4333	182.729	55.7145	0
								D09	12	56.4333	198.518	65.4724	0
								D10	12	56.4333	257.174	73.2305	0
								D11	12	56.4333	274.307	82.8409	0
								D12	Unassigned	56.4333	-3.765	-0.163926	0
								E01	Unassigned	56.4333	-1.28141	0.0369574	0
								E02	5	56.4333	135.087	33.1596	0
								E03	5	56.4333	112.534	22.7189	0
								E04	5	56.4333	113.131	30.536	0
								E05	5	56.4333	103.111	22.6581	0
								E06	5	56.4333	106.824	22.3281	0
								E07	13	56.4333	100.985	22.1409	0
								E08	13	56.4333	108.155	22.0034	0
								E09	13	56.4333	107.743	22.3231	0
								E10	13	56.4333	96.2777	22.6114	0
								E11	13	56.4333	83.827	15.2057	0
								E12	Unassigned	56.4333	-1.15745	-0.535309	0
								F01	Unassigned	56.4333	-3.34138	0.344445	0
								F02	6	56.4333	96.8015	19.2259	0
								F03	6	56.4333	97.5983	19.4915	0
								F04	6	56.4333	126.825	23.8892	0
								F05	6	56.4333	121.809	32.9379	0
								F06	6	56.4333	184.881	47.084	0
								F07	14	56.4333	193.568	37.0634	0
								F08	14	56.4333	184.344	47.3949	0
								F09	14	56.4333	196.222	45.9456	0
								F10	14	56.4333	204.685	52.5912	0
								F11	14	56.4333	173.461	45.1559	0
								F12	Unassigned	56.4333	-2.51927	-0.0585285	0
								G01	Unassigned	56.4333	-2.46253	0.438517	0
								G02	7	56.4333	111.934	37.6613	0
								G03	7	56.4333	121.585	40.1429	0
								G04	7	56.4333	114.111	35.106	0
								G05	7	56.4333	140.43	38.7702	0
								G06	7	56.4333	131.373	41.8747	0
								G07	15	56.4333	124.869	45.7198	0
								G08	15	56.4333	176.846	48.4812	0
								G09	15	56.4333	210.684	63.7061	0
								G10	15	56.4333	169.815	57.5122	0
								G11	15	56.4333	171.182	63.0706	0
								G12	Unassigned	56.4333	-2.60712	0.525203	0
								H01	Background	56.4333	0	0	0
								H02	8	56.4333	222.237	76.4169	0
								H03	8	56.4333	183.799	51.6228	0
								H04	8	56.4333	196.388	65.9775	0
								H05	8	56.4333	172.428	53.9765	0
								H06	8	56.4333	193.147	71.3678	0
								H07	16	56.4333	186.559	68.3992	0
								H08	16	56.4333	208.645	73.4217	0
								H09	16	56.4333	169.874	48.2703	0
								H10	16	56.4333	231.013	70.3697	0
								H11	16	56.4333	180.553	64.6317	0
								H12	Background	56.4333	0	0	0
								A01	Background	64.1833	0	0	0
								A02	1	64.1833	292.842	78.4897	0
								A03	1	64.1833	194.543	49.089	0
								A04	1	64.1833	199.773	54.6203	0
								A05	1	64.1833	154.923	42.813	0
								A06	1	64.1833	131.806	41.5547	0
								A07	9	64.1833	161.357	39.1831	0
								A08	9	64.1833	146.323	44.3968	0
								A09	9	64.1833	133.83	38.0339	0
								A10	9	64.1833	134.508	39.5758	0
								A11	9	64.1833	268.067	68.4593	0
								A12	Background	64.1833	0	0	0
								B01	Unassigned	64.1833	-6.59461	-0.0366034	0
								B02	2	64.1833	131.547	46.0403	0
								B03	2	64.1833	140.128	41.222	0
								B04	2	64.1833	112.752	31.9586	0
								B05	2	64.1833	128.145	37.3124	0
								B06	2	64.1833	327.191	74.1526	0
								B07	10	64.1833	182.088	62.9019	0
								B08	10	64.1833	239.551	73.9366	0
								B09	10	64.1833	234.087	65.029	0
								B10	10	64.1833	239.33	80.721	0
								B11	10	64.1833	278.488	77.3803	0
								B12	Unassigned	64.1833	-2.81316	-0.128739	0
								C01	Unassigned	64.1833	-2.30862	-0.198092	0
								C02	3	64.1833	140.356	43.6179	0
								C03	3	64.1833	236.791	57.1572	0
								C04	3	64.1833	185.569	45.6766	0
								C05	3	64.1833	204.129	52.7845	0
								C06	3	64.1833	172.782	56.1809	0
								C07	11	64.1833	232.104	58.9383	0
								C08	11	64.1833	241.36	60.9962	0
								C09	11	64.1833	223.344	62.9843	0
								C10	11	64.1833	256.561	66.6043	0
								C11	11	64.1833	286.915	84.1948	0
								C12	Unassigned	64.1833	-3.55599	-0.9373	0
								D01	Unassigned	64.1833	-3.20843	-0.167575	0
								D02	4	64.1833	235.557	61.7974	0
								D03	4	64.1833	173.486	58.6061	0
								D04	4	64.1833	191.088	66.9363	0
								D05	4	64.1833	219.739	71.6127	0
								D06	4	64.1833	235.467	68.2738	0
								D07	12	64.1833	197.279	69.1283	0
								D08	12	64.1833	183.932	55.6821	0
								D09	12	64.1833	203.538	65.3288	0
								D10	12	64.1833	264.909	72.9868	0
								D11	12	64.1833	280.266	83.0121	0
								D12	Unassigned	64.1833	-3.43796	0.0447366	0
								E01	Unassigned	64.1833	-0.964761	0.101519	0
								E02	5	64.1833	134.079	33.1952	0
								E03	5	64.1833	110.983	22.8	0
								E04	5	64.1833	111.223	30.041	0
								E05	5	64.1833	101.802	22.1433	0
								E06	5	64.1833	105.09	22.0148	0
								E07	13	64.1833	99.4071	21.8075	0
								E08	13	64.1833	105.984	22.0116	0
								E09	13	64.1833	106.165	22.1751	0
								E10	13	64.1833	94.9538	22.406	0
								E11	13	64.1833	81.7137	14.4835	0
								E12	Unassigned	64.1833	-1.64153	-0.431942	0
								F01	Unassigned	64.1833	-3.06091	0.505264	0
								F02	6	64.1833	95.4511	19.0871	0
								F03	6	64.1833	96.3261	19.3587	0
								F04	6	64.1833	124.794	23.7682	0
								F05	6	64.1833	120.424	32.6011	0
								F06	6	64.1833	184.765	46.7429	0
								F07	14	64.1833	192.239	36.5547	0
								F08	14	64.1833	183.471	47.2275	0
								F09	14	64.1833	194.332	45.1835	0
								F10	14	64.1833	203.665	52.2714	0
								F11	14	64.1833	172.89	45.2686	0
								F12	Unassigned	64.1833	-2.61929	0.0496624	0
								G01	Unassigned	64.1833	-2.59754	0.465909	0
								G02	7	64.1833	110.915	37.4553	0
								G03	7	64.1833	120.452	39.959	0
								G04	7	64.1833	112.627	34.6256	0
								G05	7	64.1833	140.285	38.6041	0
								G06	7	64.1833	130.375	41.4599	0
								G07	15	64.1833	124.458	45.4614	0
								G08	15	64.1833	176.506	48.7087	0
								G09	15	64.1833	212.427	63.1844	0
								G10	15	64.1833	169.059	57.1867	0
								G11	15	64.1833	171.327	62.312	0
								G12	Unassigned	64.1833	-2.39351	0.287439	0
								H01	Background	64.1833	0	0	0
								H02	8	64.1833	221.67	75.639	0
								H03	8	64.1833	183.966	51.1073	0
								H04	8	64.1833	194.832	65.445	0
								H05	8	64.1833	172.253	53.7188	0
								H06	8	64.1833	192.295	70.9229	0
								H07	16	64.1833	188.494	68.3231	0
								H08	16	64.1833	204.768	72.6998	0
								H09	16	64.1833	168.15	47.9139	0
								H10	16	64.1833	227.922	69.8941	0
								H11	16	64.1833	178.197	63.7372	0
								H12	Background	64.1833	0	0	0
								A01	Background	72.1167	0	0	0
								A02	1	72.1167	191.464	77.4746	0
								A03	1	72.1167	150.964	56.0098	0
								A04	1	72.1167	144.655	55.4399	0
								A05	1	72.1167	132.694	45.7232	0
								A06	1	72.1167	111.955	42.241	0
								A07	9	72.1167	136.982	41.106	0
								A08	9	72.1167	118.795	44.5537	0
								A09	9	72.1167	117.292	40.1136	0
								A10	9	72.1167	113.841	39.9091	0
								A11	9	72.1167	188.795	73.6347	0
								A12	Background	72.1167	0	0	0
								B01	Unassigned	72.1167	-6.63044	0.0827053	0
								B02	2	72.1167	125.714	46.6912	0
								B03	2	72.1167	127.584	43.6321	0
								B04	2	72.1167	107.191	33.4286	0
								B05	2	72.1167	115.573	38.6099	0
								B06	2	72.1167	200.527	79.2	0
								B07	10	72.1167	121.839	62.5061	0
								B08	10	72.1167	153.585	76.5811	0
								B09	10	72.1167	148.218	65.9698	0
								B10	10	72.1167	156.29	82.4312	0
								B11	10	72.1167	167.774	78.2748	0
								B12	Unassigned	72.1167	-2.42107	-0.256867	0
								C01	Unassigned	72.1167	-2.1098	-0.701907	0
								C02	3	72.1167	127.318	45.3995	0
								C03	3	72.1167	171.373	58.6147	0
								C04	3	72.1167	154.948	46.7811	0
								C05	3	72.1167	156.92	55.1398	0
								C06	3	72.1167	143.871	57.5848	0
								C07	11	72.1167	179.898	59.797	0
								C08	11	72.1167	185.168	63.1345	0
								C09	11	72.1167	165.156	64.3286	0
								C10	11	72.1167	180.526	67.9449	0
								C11	11	72.1167	204.555	86.568	0
								C12	Unassigned	72.1167	-2.49799	-1.16951	0
								D01	Unassigned	72.1167	-2.90919	-0.401462	0
								D02	4	72.1167	167.57	64.8022	0
								D03	4	72.1167	139.483	59.5224	0
								D04	4	72.1167	145.826	68.6528	0
								D05	4	72.1167	159.685	75.0893	0
								D06	4	72.1167	176.22	71.2671	0
								D07	12	72.1167	150.182	69.9583	0
								D08	12	72.1167	145.669	56.351	0
								D09	12	72.1167	162.005	67.5628	0
								D10	12	72.1167	189.455	73.7815	0
								D11	12	72.1167	195.037	85.2913	0
								D12	Unassigned	72.1167	-2.44301	-0.0253166	0
								E01	Unassigned	72.1167	-1.01718	-0.102825	0
								E02	5	72.1167	126.749	32.5606	0
								E03	5	72.1167	105.836	23.2231	0
								E04	5	72.1167	108.557	31.2161	0
								E05	5	72.1167	98.4205	21.9533	0
								E06	5	72.1167	102.683	22.2017	0
								E07	13	72.1167	97.6618	21.2268	0
								E08	13	72.1167	103.613	20.1782	0
								E09	13	72.1167	104.15	23.2041	0
								E10	13	72.1167	92.7013	21.4834	0
								E11	13	72.1167	79.6954	14.8479	0
								E12	Unassigned	72.1167	-1.17427	-0.684989	0
								F01	Unassigned	72.1167	-8.02093	0.440783	0
								F02	6	72.1167	91.7537	18.9595	0
								F03	6	72.1167	95.1724	19.8799	0
								F04	6	72.1167	119.949	22.9928	0
								F05	6	72.1167	117.205	32.9266	0
								F06	6	72.1167	169.829	46.7372	0
								F07	14	72.1167	174.189	35.7555	0
								F08	14	72.1167	171.034	46.4097	0
								F09	14	72.1167	176.266	45.2232	0
								F10	14	72.1167	185.67	50.3763	0
								F11	14	72.1167	156.901	45.5995	0
								F12	Unassigned	72.1167	-1.45703	0.0443992	0
								G01	Unassigned	72.1167	-2.26358	0.411461	0
								G02	7	72.1167	101.657	38.3198	0
								G03	7	72.1167	106.368	38.6947	0
								G04	7	72.1167	107.835	33.8502	0
								G05	7	72.1167	125.566	39.5841	0
								G06	7	72.1167	119.067	42.1302	0
								G07	15	72.1167	113.557	43.9062	0
								G08	15	72.1167	147.662	46.9908	0
								G09	15	72.1167	176.357	64.1006	0
								G10	15	72.1167	145.993	54.8558	0
								G11	15	72.1167	143.856	63.5886	0
								G12	Unassigned	72.1167	-1.45871	0.151043	0
								H01	Background	72.1167	0	0	0
								H02	8	72.1167	174.581	72.4044	0
								H03	8	72.1167	153.613	55.1902	0
								H04	8	72.1167	158.626	62.5646	0
								H05	8	72.1167	153.874	58.4913	0
								H06	8	72.1167	161.825	67.7057	0
								H07	16	72.1167	165.615	75.5232	0
								H08	16	72.1167	168.951	67.4672	0
								H09	16	72.1167	157.105	52.5932	0
								H10	16	72.1167	180.201	66.4071	0
								H11	16	72.1167	166.645	68.9863	0
								H12	Background	72.1167	0	0	0
								A01	Background	79.8667	0	0	0
								A02	1	79.8667	188.561	77.3754	0
								A03	1	79.8667	143.631	53.5172	0
								A04	1	79.8667	143.432	54.5528	0
								A05	1	79.8667	129.232	44.4396	0
								A06	1	79.8667	110.736	42.2441	0
								A07	9	79.8667	135.045	40.9238	0
								A08	9	79.8667	118.776	44.2442	0
								A09	9	79.8667	114.49	39.6148	0
								A10	9	79.8667	113.392	41.8103	0
								A11	9	79.8667	182.67	67.7732	0
								A12	Background	79.8667	0	0	0
								B01	Unassigned	79.8667	-5.68225	-0.147083	0
								B02	2	79.8667	125.425	47.5197	0
								B03	2	79.8667	125.891	42.3708	0
								B04	2	79.8667	105.802	33.0868	0
								B05	2	79.8667	114.297	38.7987	0
								B06	2	79.8667	197.6	75.3324	0
								B07	10	79.8667	118.483	61.9385	0
								B08	10	79.8667	149.397	74.158	0
								B09	10	79.8667	144.084	65.6959	0
								B10	10	79.8667	149.828	79.9945	0
								B11	10	79.8667	165.615	78.795	0
								B12	Unassigned	79.8667	-2.19474	-0.36253	0
								C01	Unassigned	79.8667	-1.66671	-0.436304	0
								C02	3	79.8667	126.971	45.525	0
								C03	3	79.8667	168.376	59.4932	0
								C04	3	79.8667	154.804	44.7126	0
								C05	3	79.8667	155.54	52.2409	0
								C06	3	79.8667	144.031	56.3845	0
								C07	11	79.8667	179.263	58.4147	0
								C08	11	79.8667	183.671	62.1182	0
								C09	11	79.8667	163.99	63.5575	0
								C10	11	79.8667	178.626	68.1162	0
								C11	11	79.8667	202.898	84.0667	0
								C12	Unassigned	79.8667	-2.63907	-0.577569	0
								D01	Unassigned	79.8667	-1.65012	-0.328491	0
								D02	4	79.8667	164.761	62.8727	0
								D03	4	79.8667	137.201	58.9072	0
								D04	4	79.8667	145.2	67.1976	0
								D05	4	79.8667	158.363	72.4018	0
								D06	4	79.8667	176.017	69.797	0
								D07	12	79.8667	150.312	68.0667	0
								D08	12	79.8667	144.543	55.5769	0
								D09	12	79.8667	160.598	65.9523	0
								D10	12	79.8667	187.993	71.2487	0
								D11	12	79.8667	194.237	83.6467	0
								D12	Unassigned	79.8667	-2.02595	-0.206745	0
								E01	Unassigned	79.8667	0.0953161	-0.282264	0
								E02	5	79.8667	125.825	32.1639	0
								E03	5	79.8667	104.506	23.5855	0
								E04	5	79.8667	108.638	32.1279	0
								E05	5	79.8667	98.2659	21.4092	0
								E06	5	79.8667	102.387	21.9673	0
								E07	13	79.8667	97.3388	20.9322	0
								E08	13	79.8667	103.388	19.9275	0
								E09	13	79.8667	103.069	22.5643	0
								E10	13	79.8667	92.064	21.7808	0
								E11	13	79.8667	80.1916	15.164	0
								E12	Unassigned	79.8667	-0.745986	-0.614263	0
								F01	Unassigned	79.8667	-4.14255	0.10782	0
								F02	6	79.8667	90.9121	18.5714	0
								F03	6	79.8667	94.1707	20.6767	0
								F04	6	79.8667	119.867	23.7967	0
								F05	6	79.8667	116.808	32.7476	0
								F06	6	79.8667	170.387	46.8517	0
								F07	14	79.8667	174.552	35.3755	0
								F08	14	79.8667	171.018	45.6225	0
								F09	14	79.8667	175.901	44.3905	0
								F10	14	79.8667	185.136	49.6773	0
								F11	14	79.8667	155.813	45.9042	0
								F12	Unassigned	79.8667	-1.65374	-0.457791	0
								G01	Unassigned	79.8667	-1.19838	0.0383519	0
								G02	7	79.8667	101.188	37.498	0
								G03	7	79.8667	106.942	38.9565	0
								G04	7	79.8667	108.035	34.1628	0
								G05	7	79.8667	124.299	37.4401	0
								G06	7	79.8667	118.591	41.1828	0
								G07	15	79.8667	113.824	43.2989	0
								G08	15	79.8667	146.637	47.336	0
								G09	15	79.8667	175.386	64.1884	0
								G10	15	79.8667	143.755	55.3909	0
								G11	15	79.8667	143.452	62.2548	0
								G12	Unassigned	79.8667	-1.69926	0.121998	0
								H01	Background	79.8667	0	0	0
								H02	8	79.8667	174.628	70.7953	0
								H03	8	79.8667	150.119	51.0489	0
								H04	8	79.8667	157.837	61.8499	0
								H05	8	79.8667	149.74	54.1789	0
								H06	8	79.8667	162.523	68.9855	0
								H07	16	79.8667	161.164	71.1241	0
								H08	16	79.8667	169.554	69.793	0
								H09	16	79.8667	151.756	49.229	0
								H10	16	79.8667	180.909	67.9018	0
								H11	16	79.8667	164.01	65.5421	0
								H12	Background	79.8667	0	0	0
								A01	Background	87.6	0	0	0
								A02	1	87.6	185.786	76.1631	0
								A03	1	87.6	141.265	49.6061	0
								A04	1	87.6	140.748	53.5479	0
								A05	1	87.6	125.147	41.7104	0
								A06	1	87.6	107.897	40.701	0
								A07	9	87.6	129.415	38.0067	0
								A08	9	87.6	116.742	43.4112	0
								A09	9	87.6	110.552	37.3813	0
								A10	9	87.6	110.443	39.2407	0
								A11	9	87.6	176.422	64.982	0
								A12	Background	87.6	0	0	0
								B01	Unassigned	87.6	-5.96441	-0.200932	0
								B02	2	87.6	121.821	47.4911	0
								B03	2	87.6	124.087	41.1257	0
								B04	2	87.6	104.403	32.495	0
								B05	2	87.6	111.881	37.9046	0
								B06	2	87.6	192.874	73.8837	0
								B07	10	87.6	116.199	61.2025	0
								B08	10	87.6	145.82	71.6578	0
								B09	10	87.6	141.412	63.7594	0
								B10	10	87.6	146.272	78.0358	0
								B11	10	87.6	162.837	76.8877	0
								B12	Unassigned	87.6	-2.18151	-0.220026	0
								C01	Unassigned	87.6	-2.04157	-0.177225	0
								C02	3	87.6	125.09	44.4991	0
								C03	3	87.6	166.088	56.546	0
								C04	3	87.6	152.736	44.2197	0
								C05	3	87.6	152.598	51.1019	0
								C06	3	87.6	141.078	55.1585	0
								C07	11	87.6	176.179	57.0658	0
								C08	11	87.6	180.364	60.4333	0
								C09	11	87.6	160.791	62.1152	0
								C10	11	87.6	175.158	66.3598	0
								C11	11	87.6	200.443	82.5325	0
								C12	Unassigned	87.6	-2.52744	-0.632867	0
								D01	Unassigned	87.6	-1.89074	-0.156384	0
								D02	4	87.6	162.24	60.5136	0
								D03	4	87.6	135.515	56.8393	0
								D04	4	87.6	143.069	65.6432	0
								D05	4	87.6	155.883	70.6413	0
								D06	4	87.6	172.607	67.4214	0
								D07	12	87.6	147.809	66.7634	0
								D08	12	87.6	141.943	54.6951	0
								D09	12	87.6	157.752	64.4235	0
								D10	12	87.6	184.466	69.0658	0
								D11	12	87.6	190.862	80.5128	0
								D12	Unassigned	87.6	-2.48321	-0.224637	0
								E01	Unassigned	87.6	0.104471	-0.128143	0
								E02	5	87.6	123.545	32.525	0
								E03	5	87.6	102.655	23.0171	0
								E04	5	87.6	106.413	32.0521	0
								E05	5	87.6	96.7103	22.2817	0
								E06	5	87.6	99.8314	22.0797	0
								E07	13	87.6	94.8384	20.872	0
								E08	13	87.6	101.387	20.5724	0
								E09	13	87.6	101.042	22.7002	0
								E10	13	87.6	91.086	21.7858	0
								E11	13	87.6	77.7023	15.1306	0
								E12	Unassigned	87.6	-0.936689	-0.475791	0
								F01	Unassigned	87.6	-4.434	0.175827	0
								F02	6	87.6	89.279	18.3176	0
								F03	6	87.6	91.9578	20.4447	0
								F04	6	87.6	117.552	23.8354	0
								F05	6	87.6	114.771	32.8187	0
								F06	6	87.6	167.39	47.0639	0
								F07	14	87.6	172.984	36.8104	0
								F08	14	87.6	169.162	46.1509	0
								F09	14	87.6	173.554	44.1939	0
								F10	14	87.6	182.062	50.7119	0
								F11	14	87.6	152.656	45.4697	0
								F12	Unassigned	87.6	-1.21175	-0.257565	0
								G01	Unassigned	87.6	-1.40642	0.200113	0
								G02	7	87.6	100.196	36.9606	0
								G03	7	87.6	105.789	39.4374	0
								G04	7	87.6	106.548	34.1117	0
								G05	7	87.6	123.632	38.2552	0
								G06	7	87.6	116.511	41.8635	0
								G07	15	87.6	112.892	43.8607	0
								G08	15	87.6	144.988	47.8249	0
								G09	15	87.6	173.307	62.3667	0
								G10	15	87.6	142.583	56.6724	0
								G11	15	87.6	141.243	61.2343	0
								G12	Unassigned	87.6	-1.36099	0.305503	0
								H01	Background	87.6	0	0	0
								H02	8	87.6	173.688	73.5063	0
								H03	8	87.6	147.769	50.4257	0
								H04	8	87.6	156.046	64.4262	0
								H05	8	87.6	147.35	53.1253	0
								H06	8	87.6	161.499	70.1682	0
								H07	16	87.6	157.589	70.678	0
								H08	16	87.6	169.86	73.1338	0
								H09	16	87.6	149.053	48.3283	0
								H10	16	87.6	181.108	71.4203	0
								H11	16	87.6	159.334	63.1033	0
								H12	Background	87.6	0	0	0

## Sheet: Supplementary Table5
Supplementary Table5
Raw data of relative TMRM fluorescence(related to Fig5 A-B)			Raw data of rtPCR(related to Fig5 D)
Control	ShOPA1		Sample Name	Target Name	CT	Ct Mean	mRNA expression
63.74	86.518		Control	GAPDH	16.2709	16.1909
79.82	87.255		Control	GAPDH	16.2224	16.1909
97.106	84.884		Control	GAPDH	16.0792	16.1909
112.3	91.871		ShOPA1	GAPDH	14.7032	14.5889
122.428	96.829		ShOPA1	GAPDH	14.5728	14.5889
159.379	66.546		ShOPA1	GAPDH	14.4907	14.5889
158.617	85.602		H2O	GAPDH	35.7056	35.5927
173.185	74.511		H2O	GAPDH	Undetermined	35.5927
152.595	59.199		H2O	GAPDH	35.4798	35.5927
179.189	89.859		Control	CDC20	23.9663	23.8601	0.0048246
158.575	88.61		Control	CDC20	23.7805	23.8601	0.00530616
178.52	78.039		Control	CDC20	23.8335	23.8601	0.00463166
179.133	85.157		ShOPA1	CDC20	24.0338	23.167	0.00155318
173.216	73.926		ShOPA1	CDC20	22.9908	23.167	0.00292372
154.211	59.93		ShOPA1	CDC20	22.4763	23.167	0.00394538
162.143	107.823		H2O	CDC20	Undetermined	38.4271
184.697	71.995		H2O	CDC20	Undetermined	38.4271
193.924	57.178		H2O	CDC20	38.4271	38.4271
182.849	69.095		Control	CDK1	23.7953	23.2666	0.00543179
39.176	62.919		Control	CDK1	23.2688	23.2666	0.00756552
47.684	91.248		Control	CDK1	22.7356	23.2666	0.00991337
55.915	88.924		ShOPA1	CDK1	24.3587	24.3546	0.00124001
64.296	99.492		ShOPA1	CDK1	24.3645	24.3546	0.00112821
69.361	119.375		ShOPA1	CDK1	24.3406	24.3546	0.00108366
74.467	105.273		H2O	CDK1	Undetermined
80.786	73.466		H2O	CDK1	Undetermined
148.528	103.299		H2O	CDK1	Undetermined
103.937	61.098		Control	CDC25	25.4197	24.9147	0.00176174
122.499	69.854		Control	CDC25	24.9261	24.9147	0.00239852
99.956	68.006		Control	CDC25	24.3983	24.9147	0.0031312
155.031	123.679		ShOPA1	CDC25	24.6054	24.4222	0.00104507
154.752	84.895		ShOPA1	CDC25	24.3098	24.4222	0.00117186
161.141	64.868		ShOPA1	CDC25	24.3513	24.4222	0.00107562
131.057	56.234		H2O	CDC25	33.7265	34.0356
122.377	58.901		H2O	CDC25	34.3448	34.0356
147.556	56.498		H2O	CDC25	Undetermined	34.0356
122.922	64.937
147.318	69.085
	78.588
	73.891
Raw data of cell cycle(related to Fig6 E)
	Control_1	Control_2	Control_3	ShOPA1_1	ShOPA1_2	ShOPA1_3
G1/G0	0.5278	0.5237	0.5297	0.7474	0.7557	0.7567
G2/M	0.1124	0.0964	0.1169	0.0765	0.0644	0.0679
Raw data of flow cytometry(related to Fig6 F)
	Control_1	Control_2	Control_3	ShOPA1_1	ShOPA1_2	ShOPA1_3
apoptotic cells	6.08	4.46	5.66	10.57	9.43	10.6

## Sheet: Supplementary Table6
Supplementary Table6
Raw data of CCK8 in A549 cell lines(related to Fig6 B)
Control						ShOPA1_1						ShOPA1_2
0.976891	1.0248	1.0248	0.982227	0.988465	1.00281	0.983366	1.01833	1.00918	0.982669	0.983005	1.02345	0.970743	0.976756	0.971785	0.989456	1.04881	1.04245
1.38888	1.54812	1.47942	1.4708	1.45386	1.55318	1.30853	1.36642	1.36274	1.31765	1.37848	1.34301	1.39971	1.49573	1.37199	1.48099	1.49076	1.5329
2.1222	2.15089	2.20303	2.13437	2.14117	2.22029	1.85393	1.96004	1.86519	1.93004	1.85492	1.89835	1.85178	1.86611	1.90936	1.79384	1.92674	1.89197
2.60158	2.95805	2.79471	2.6926	2.65587	2.70253	2.14508	2.21849	2.29339	2.15463	2.17342	2.16406	2.6548	2.50675	2.58251	2.67781	2.88644	2.58012
4.0143	4.06004	3.98195	4.06443	4.24047	4.26912	2.54642	2.61235	2.55099	2.52453	2.63304	2.52813	3.43003	3.50319	3.55747	3.28263	3.62194	3.45174
5.58365	5.82507	5.86504	5.94336	5.67837	5.75623	3.23674	3.27909	3.16913	3.06422	2.98963	3.11186	4.63923	4.85632	4.42301	4.49812	4.66854	4.54371
6.80059	6.82567	6.97141	6.95574	6.46732	6.8592	3.99371	3.7519	3.86354	3.87581	3.5943	3.82288	5.94785	5.93721	5.88446	5.77895	5.78199	5.79372
Raw data of clone formation in A549 cell lines(related to Fig6 C)					Raw data of migration formation in A549 cell lines(related to Fig6 D)
Control	ShOPA1_1	ShOPA1_2			Control	ShOPA1_1	ShOPA1_2
73	47	64			123	32	61
77	49	43			200	41	118
91	40	55			142	80	116
85	36	70			181	46	67
90	26	66			232	55	100
85	38	54			80	66	96
50					160	46	76
82					186	39	84
63					164	94	139
71					75	55.4444	95.2222
75					209
					64
					72
					199
					101
					90
					180
Raw data of CCK8 in H1299 cell lines(related to Fig6 F)
Control						ShOPA1_1						ShOPA1_2
0.43182	0.45812	0.45366	0.42289	0.44415	0.44461	0.3916	0.41481	0.42088	0.41566	0.42446	0.4182	0.42052	0.43543	0.42461	0.44211	0.45375	0.44595
0.60024	0.66816	0.65612	0.63311	0.65832	0.63414	0.5104	0.52809	0.49821	0.50278	0.52931	0.54691	0.5364	0.56886	0.53903	0.56331	0.56893	0.58162
0.86252	0.92813	0.87371	0.87674	0.88854	0.91025	0.66319	0.70354	0.69261	0.71255	0.69639	0.68681	0.66304	0.68266	0.69118	0.68245	0.71431	0.74677
1.1027	1.1448	1.1155	1.1351	1.1458	1.183	0.82141	0.81207	0.81451	0.82787	0.80327	0.79097	0.77297	0.81081	0.78149	0.84942	0.85548	0.82943
1.3121	1.3648	1.4189	1.3036	1.3794	1.3883	0.8842	0.8944	0.7464	0.9502	0.8758	0.8855	0.8218	1.0098	0.8527	0.8801	0.9054	0.9349
1.7902	1.8905	1.9607	1.8333	1.9291	1.8566	1.2796	1.292	1.3162	1.3524	1.3478	1.3353	1.4299	1.3615	1.4175	1.3342	1.3843	1.4321
2.3985	2.3165	2.3715	2.3399	2.3224	2.3423	1.8402	1.7946	1.7901	1.7874	1.77	1.688	1.801	1.6601	1.7553	1.6632	1.6073	1.6912
Raw data of clone formation in H1299 cell lines(related to Fig6 G)					Raw data of migration formation in H1299 cell lines(related to Fig6 H)
Control	SiOPA1-1	SiOPA1-2			Control	SiOPA1-1	SiOPA1-2
62	19	20			735	186	217
67	22	26			832	259	216
68	16	20			708	395	208
56	17	22			724	328	204
70	24	29			855	313	204
78	19	23			665	323	160
59					788	330	208
66					757	225	150
60					793	344	191
65
60
45
Raw data of clone formation in A549 cell lines(related to Fig6 J)
Control						OPA1+
0.42285	0.44359	0.44359	0.42516	0.42786	0.43407	0.46251	0.48098	0.47239	0.47516	0.49981	0.49926
0.60118	0.67011	0.64037	0.63664	0.62931	0.6723	0.73754	0.72494	0.70417	0.7302	0.74112	0.75688
0.9186	0.93102	0.95359	0.92387	0.92681	0.96106	1.0594	1.0396	0.96659	0.98526	1.0324	1.0231
1.1261	1.2804	1.2097	1.1655	1.1496	1.1698	1.54	1.5135	1.6228	1.5594	1.6616	1.5622
1.7376	1.7574	1.7236	1.7593	1.8355	1.8479	2.1562	2.2141	2.0945	2.096	2.0363	2.0606
2.4169	2.5214	2.5387	2.5726	2.4579	2.4916	2.5037	2.5193	2.5875	2.4655	2.5081	2.5804
2.8138	2.6948	2.7146	2.7511	2.7994	2.7526	2.7155	2.6778	2.5223	2.5064	2.6861	2.6705
Raw data of clone formation in A549 cell lines(related to Fig6 K)				Raw data of migration formation in A549 cell lines(related to Fig6 L)
Control	OPA1+			Control	SiOPA1-1
52	101			92	179
39	86			52	211
54	100			68	163
61	72			81	143
43	111			70
62	84

## Sheet: Supplementary Table7
Raw data of CCK8 in H1299 cell lines(related to supplementary Figure3)
Control						MYLS22						Oligomycin A
0.2658	0.277	0.2776	0.2753	0.2692	0.2643	0.2661	0.2785	0.2665	0.2589	0.2712	0.2664	0.3027	0.2561	0.2672	0.2676	0.2607	0.2753
0.3348	0.3548	0.3404	0.3642	0.3542	0.3606	0.3187	0.3141	0.3188	0.3193	0.3199	0.3453	0.3059	0.3034	0.295	0.2863	0.2933	0.3083
0.4628	0.492	0.5003	0.5043	0.4718	0.5032	0.4101	0.3935	0.4476	0.4113	0.413	0.4435	0.3307	0.3361	0.3325	0.35	0.3304	0.3291
0.7346	0.8069	0.7994	0.7777	0.7649	0.8042	0.6367	0.6211	0.5571	0.585	0.5628	0.6093	0.376	0.3483	0.3581	0.3376	0.359	0.3529
1.0581	1.1208	1.0623	1.0199	1.0761	1.0451	0.8532	0.8551	0.8408	0.8051	0.8196	0.8873	0.4886	0.415	0.3592	0.3819	0.3784	0.4077
Raw data of clone formation in H1299 cell lines(related to supplementary Figure3)					Raw data of migration formation in H1299 cell lines(related to supplementary Figure3)
Control	MYLS22	Oligomycin A			Control	MYLS22	Oligomycin A
56	10	2			867	875	708
48	9	4			927	795	622
46	8	3			908	623	531
					953	522	527
					860	423	428
					934	632	496
					982	618	358
					905	422	372
					904	611	486
					875	354	558
					906	316	572
					924	460	539
					890	401	488
					956	688	601
					975	599	358
